# Supplementary material
Source: HighWire-hosted journal article supplement (https://bmjopen.bmj.com/content/11/10/e055085)
Supplement: inline-supplementary-material-1 [file inline-supplementary-material-1.pdf]

## Supplementary material to ‘A national survey of attitudes towards and intentions to vaccinate against COVID-19: implications for communications’.

### Contents

- Methods S1: Questionnaire for the OPTIMising general public Uptake of a COVID-19 vaccine (OPTIMUM) study.
- Table S1 Overall response rate calculation accounting for recruitment onto original panel and panel attrition.
- Methods S2: Non-response weights.
- Table S2 Doctors, nurses or other healthcare professionals – Association between trust in sources of information about COVID-19 vaccine and socio-demographic variables – (a) bivariate results and (b) multivariate logistic regression.
- Table S3 Pharmacists – Association between trust in sources of information about COVID-19 vaccine and socio-demographic variables – (a) bivariate results and (b) multivariate logistic regression.
- Table S4 The NHS – Association between trust in sources of information about COVID-19 vaccine and socio-demographic variables – (a) bivariate results and (b) multivariate logistic regression.
- Table S5 Drug companies who manufacture vaccines – Association between trust in sources of information about COVID-19 vaccine and socio-demographic variables – (a) bivariate results and (b) multivariate logistic regression.
- Table S6 The UK Government – Association between trust in sources of information about COVID-19 vaccine and socio-demographic variables – (a) bivariate results and (b) multivariate logistic regression.
- Table S7 The Scottish/Welsh Government – Association between trust in sources of information about COVID-19 vaccine and socio-demographic variables – (a) bivariate results and (b) multivariate logistic regression.
- Table S8 Scientific and medical advisers – Association between trust in sources of information about COVID-19 vaccine and socio-demographic variables – (a) bivariate results and (b) multivariate logistic regression.
- Table S9 The World Health Organisation (WHO) – Association between trust in sources of information about COVID-19 vaccine and socio-demographic variables – (a) bivariate results and (b) multivariate logistic regression.
- Table S10 The media (e.g. newspapers, magazines, television, radio) – Association between trust in sources of information about COVID-19 vaccine and socio-demographic variables – (a) bivariate results and (b) multivariate logistic regression.
- Table S11 Social media – Association between trust in sources of information about COVID-19 vaccine and socio-demographic variables – (a) bivariate results and (b) multivariate logistic regression.
- Table S12 Celebrities and social media influencers – Association between trust in sources of information about COVID-19 vaccine and socio-demographic variables – (a) bivariate results and (b) multivariate logistic regression.
- Table S13 Family and friends – Association between trust in sources of information about COVID-19 vaccine and socio-demographic variables – (a) bivariate results and (b) multivariate logistic regression.
- Table S14 Faith or community leaders – Association between trust in sources of information about COVID-19 vaccine and socio-demographic variables – (a) bivariate results and (b) multivariate logistic regression.

**Methods S1: Questionnaire for the OPTIMising general public Uptake of a COVID-19 vaccine (OPTIMUM) study****Socio-demographic questions****{ASK IF DemogUpd = 0}****EconAct**

Which of these descriptions applied to what you spent the **most** time doing last week, that is the seven days ending last Sunday?

\_WEB: "Please select one answer on every row"

\_TEL: "INTERVIEWER: READ OUT EACH STATEMENT AND THE ANSWER CODES. REPEAT ANSWER CODES AS REQUIRED."

1. In full-time education (including on vacation)
2. On government training/employment programme
3. In paid work (or away temporarily, including furlough) for at least 10 hours in week
4. Waiting to take up paid work already accepted
5. Unemployed
6. Permanently sick or disabled
7. Wholly retired from work
8. Looking after your home or family
9. Doing something else

**{ASK ALL}****C19HiRsk**

Since the start of the COVID-19 outbreak, have you ever been contacted by your GP or Healthcare Provider to say that you are at severe risk from COVID-19 and advised to shield?

1. Yes
2. No
3. Don't know

**{ASK ALL}****C19HiRskHH**

And since the start of the COVID-19 outbreak, has anyone else in your household ever been contacted by their GP or Healthcare Provider to say that they are at severe risk from COVID-19 and advised to shield?

1. Yes
2. No
3. Don't know

**{ASK IF FF\_Sex = 2 AND FF\_Age LT 50}****Preg**

"Are you currently pregnant?"

1. Yes
2. No

**{ASK IF Cur\_EconAct = 3 OR EconAct = 3}****EmpCond [MULTICODE; RANDOMISE 1...3]**

"Which, if any, of the following apply to you?"

\_WEB: "Please select all that apply"

\_TEL: "INTERVIEWER: READ OUT EACH OPTION AND CODE ALL THAT APPLY"

1. In my current job I'm required to work in close proximity with other people
2. I work in social care and have direct contact with patients or members of the public
3. I work in health care and have direct contact with patients or members of the public
4. None of these [EXCLUSIVE]

**Vaccines**

{ASK ALL}

**VaccQInt**

“The next set of questions will ask you about your views on &lt;b&gt;vaccines in general&lt;/b&gt;.”

DISPLAY

{ASK ALL}

**VaccSafe [FLIP SCALE]**

In general, how often do you think vaccines cause serious side effects?

\_WEB: “Please select one answer on every row”

\_TEL: “INTERVIEWER: READ OUT EACH STATEMENT AND THE ANSWER CODES. REPEAT ANSWER CODES AS REQUIRED.”

1. Always
2. Frequently
3. Sometimes
4. Rarely
5. Never

{ASK ALL}

**VaccMildSE [FLIP SCALE]**

In general, how likely would you be to accept a vaccine that caused mild side effects?

By mild side effects we mean things like a mild fever, pain or swelling at the injection site, or feeling a bit unwell for a few days

\_WEB: “Please select one answer on every row”

\_TEL: “INTERVIEWER: READ OUT EACH STATEMENT AND THE ANSWER CODES. REPEAT ANSWER CODES AS REQUIRED.”

1. Very likely
2. Quite likely
3. Neither likely nor unlikely
4. Quite unlikely
5. Very unlikely

{ASK ALL}

**VaccEffec [FLIP SCALE]**

How much protection do you think the flu vaccine provides against flu?

INTERVIEWER: READ OUT

1. Complete protection
2. A lot of protection
3. Some protection
4. A little protection
5. No protection at all

{ASK ALL}

**VaccAtt [GRID; FLIP SCALE; RANDOMISE ROWS]**

“{WEB: “Below are”; TEL: “I will now read out”} some statements about &lt;b&gt;vaccines in general&lt;/b&gt;.”

To what extent do you agree or disagree with each of the following?

\_WEB: “Please select one answer on every row”

\_TEL: “INTERVIEWER: READ OUT EACH STATEMENT AND THE ANSWER CODES. REPEAT ANSWER CODES AS REQUIRED.”

## GRID ROWS

1. Government decisions about vaccines are made in people's best interests
2. My immune system is strong enough that I don't need most vaccines
3. The illnesses that vaccines prevent are not severe enough for me to get vaccinated
4. I get vaccinated because it helps to protect other people as well as me
5. I follow the recommendation of healthcare professionals when deciding whether or not to get a vaccine

## GRID COLS

1. Strongly agree
2. Agree
3. Neither agree nor disagree
4. Disagree
5. Strongly disagree

{ASK ALL}

VaccAccepCh [FLIP SCALE 1...4]

Thinking about times a healthcare professional has recommended <b>your children</b> get a vaccine, how often have you followed that recommendation (that is, if you have any children)?

\_WEB: "Please select one answer on every row"

\_TEL: "INTERVIEWER: READ OUT EACH STATEMENT AND THE ANSWER CODES. REPEAT ANSWER CODES AS REQUIRED."

1. All of the time
2. Most of the time
3. Some of the time
4. None of the time
5. They have never been offered a vaccine
6. I do not have any children

{ASK ALL}

VaccAccep [FLIP SCALE 1...4]

And thinking about times a health-care professional has recommended <b>you</b> get a vaccine, how often have you followed that recommendation?

\_WEB: "Please select one answer on every row"

\_TEL: "INTERVIEWER: READ OUT EACH STATEMENT AND THE ANSWER CODES. REPEAT ANSWER CODES AS REQUIRED."

1. All of the time
2. Most of the time
3. Some of the time
4. None of the time
5. I have never been offered a vaccine

**Covid-19 Vaccine**

{ASK ALL}

C19VaccQInt

"The next set of questions will ask you about your views on <b>a vaccine for COVID-19</b>."

## DISPLAY

{ASK ALL}

C19VaccOff

"Have you been offered a vaccine for COVID-19?"

1. Yes
2. No

{IF C19VaccOff = 1}

**C19VaccAcc1**

“And have you had that vaccine?”

{WEB: “Please select ‘Yes’ if you have only had one of multiple doses”}

INTERVIEWER: “Please include if you have only had one of multiple doses”

1. Yes
2. No

{IF C19VaccAcc1 = 2}

**C19VaccInt**

“And do you intend to have that vaccine?”

\_WEB: “Please select one answer on every row”

\_TEL: “INTERVIEWER: READ OUT EACH STATEMENT AND THE ANSWER CODES. REPEAT ANSWER CODES AS REQUIRED.”

1. Yes
2. No
3. Not sure

{IF C19VaccOff <> 1}

**C19VaccAcc2**

Would you accept the vaccine for yourself if it is offered to you?

\_WEB: “Please select one answer on every row”

\_TEL: “INTERVIEWER: READ OUT EACH STATEMENT AND THE ANSWER CODES. REPEAT ANSWER CODES AS REQUIRED.”

1. Yes
2. No
3. Not sure

{IF C19VaccAcc2 = 3 or -8}

**C19VaccAcc3**

“Thank you for your response.

<b>We would really like to know your opinion on this, even if you are unsure or don’t feel you know enough.</b>

If you had to choose, if a COVID-19 vaccine became publicly available and you were offered it, would you accept the vaccine for yourself?

\_WEB: “Please select one answer on every row”

\_TEL: “INTERVIEWER: READ OUT EACH STATEMENT AND THE ANSWER CODES. REPEAT ANSWER CODES AS REQUIRED.”

1. Yes
2. No
3. I’m really not sure

{IF C19VaccInt = 2,3, -8 OR C19VaccAcc2 = 2 OR C19VaccAcc3 = 2,3, -8}

**C19VaccWhyNo [MULTICODE: RANDOMISE 1...12]**

For which, if any, of the following reasons {IF C19VaccInt = 2: “did you not”; IF C19VaccAcc2 = 2 OR C19VaccAcc3 = 2: “would you not”; IF C19VaccAcc3 = 3 or -8 or C19VaccInt =3 or -8: “are you unsure if you would”} accept a vaccine for COVID-19?

\_WEB: “Please select all that apply”

\_TEL: “INTERVIEWER: READ OUT EACH OPTION AND CODE ALL THAT APPLY”

1. I don’t think COVID-19 is severe enough

2. I am concerned that vaccines are being rushed in
3. I am concerned that the vaccines have not been properly tested
4. I am frightened of needles
5. I don't feel that I have enough information about the vaccines
6. I don't think that the vaccines would be effective
7. I am worried about ingredients in the vaccines
8. I am worried that I would have a bad reaction or be allergic to it
9. I don't trust the motives of those involved in developing COVID-19 vaccines (governments, pharmaceutical companies etc.).
10. I do not believe in vaccines
11. I feel I don't need a vaccine
12. It would be inconvenient for me to get vaccinated
13. Other reason (Please describe)
14. None of these (EXCLUSIVE)

{ASK ALL}

C19VaccDec [GRID; FLIP SCALE 1...5; RANDOMISE ROWS]

How much {IF C19VaccOff = 1: "did"; IF C19VaccOff <> 1: "would"} your decision to get a COVID-19 vaccine depend on each of the following?

\_WEB: "Please select one answer on every row"

\_TEL: "INTERVIEWER: READ OUT EACH STATEMENT AND THE ANSWER CODES. REPEAT ANSWER CODES AS REQUIRED."

#### GRID ROWS

1. The country in which the vaccine is developed
2. Whether or not the vaccine is recommended by my GP/healthcare professional
3. Whether or not the vaccine is recommended by the NHS
4. Whether or not the vaccine has been tested in large trials
5. Whether or not the vaccine has been in use for a few months with no serious side-effects
6. Whether or not people I know had already had the vaccine
7. Whether or not my GP/healthcare professional had already had the vaccine
8. Whether or not my local faith leader had recommended it
9. How easy or difficult it is to get the vaccine
10. Whether or not more than one injection was needed to provide adequate protection
11. Whether or not it would allow me to get my life back (be able to go out socialising, get back to work etc)
12. Whether or not it would help to protect members of my family who are vulnerable to COVID-19

#### GRID COLS

1. Completely
2. A great deal
3. Somewhat
4. Very little
5. Not at all

{ASK ALL}

C19VaccAccFF [FLIP SCALE 1...5]

"Thinking about your family and friends, how many do you think would get vaccinated against COVID-19 if a vaccine was offered to them?"

\_WEB: "Please select one answer on every row"

\_TEL: "INTERVIEWER: READ OUT EACH STATEMENT AND THE ANSWER CODES. REPEAT ANSWER CODES AS REQUIRED."

1. All of them
2. Most of them
3. About half of them
4. Some of them
5. None of them
6. Not applicable

**{ASK ALL}****C19VaccSupFF [FLIP SCALE 1...5]**

“To what extent do you think your family and friends support or oppose you getting vaccinated against COVID-19?”

\_WEB: “Please select one answer on every row”

\_TEL: “INTERVIEWER: READ OUT EACH STATEMENT AND THE ANSWER CODES. REPEAT ANSWER CODES AS REQUIRED.”

1. Strongly oppose
2. Oppose
3. Neither oppose nor support
4. Support
5. Strongly support
6. Not applicable

**{ASK ALL}****C19VaccTrstInf [GRID; FLIP SCALE; RANDOMISE ROWS]**

“Thinking about {IF C19VaccOff = 1: “when”; IF C19VaccOff > 1: “if”} you had to make a decision on whether or not to get a COVID-19 vaccine...

To what extent, if at all, would you trust information about a COVID-19 vaccine from each of the following sources?

\_WEB: “Please select one answer on every row”

\_TEL: “INTERVIEWER: READ OUT EACH STATEMENT AND THE ANSWER CODES. REPEAT ANSWER CODES AS REQUIRED.”

**GRID ROWS**

1. Doctors, nurses, or other healthcare professionals
2. Pharmacists
3. The NHS
4. Drug companies who manufacture vaccines
5. The UK Government
6. {IF Cur\_Country = 2: “The Scottish government”; IF Cur\_Country = 3: “The Welsh Assembly”}
7. Scientific and medical advisers
8. The World Health Organisation (WHO)
9. The media (e.g. newspapers, magazines, television, radio)
10. Social media (e.g. Twitter, Facebook, Instagram etc)
11. Celebrities and social media influencers
12. Family and friends
13. Faith or community leaders

**GRID COLS**

1. Completely
2. A great deal
3. Somewhat
4. Very little
5. Not at all

**{ASK ALL}****C19VaccPriAccep [GRID; FLIP SCALE; RANDOMISE ROWS]**

A COVID-19 vaccine will be offered to some groups of people before other groups, and it is possible that not everyone in the population will be offered a COVID-19 vaccine.

How acceptable or unacceptable do you think each of the following are?

\_WEB: “Please select one answer on every row”

\_TEL: “INTERVIEWER: READ OUT EACH STATEMENT AND THE ANSWER CODES. REPEAT ANSWER CODES AS REQUIRED.”

## GRID ROWS

1. Some people being offered a COVID-19 vaccine before others
2. Some people not being offered a COVID-19 vaccine at all

## GRID COLS

1. Very acceptable
2. Somewhat acceptable
3. Neither acceptable nor unacceptable
4. Somewhat unacceptable
5. Very unacceptable

**{ASK ALL}****C19VaccPri [GRID; FLIP SCALE 1...5; RANDOMISE ROWS]**

“{WEB: “Below are”; TEL: “I will now read out”} some groups that some people say should be the first to be offered a COVID-19 vaccine. For each one, how high a priority do you think it is that they get a COVID-19 vaccine, or do you not think they should be offered the vaccine at all?”

Please answer on a scale of 1 to 5 where 1 means you think they should be one of the first groups to be offered the vaccine, and 5 means you think they should be one of the last groups to be offered the vaccine.

\_WEB: “Please select one answer on every row”

\_TEL: “INTERVIEWER: READ OUT EACH STATEMENT AND THE ANSWER CODES. REPEAT ANSWER CODES AS REQUIRED.”

## GRID ROWS

1. Doctors, nurses, and other healthcare professionals
2. People aged 18 to 30
3. Social care workers
4. People aged under 18
5. People with serious health conditions which mean they are vulnerable to COVID-19
6. Residents in a care home
7. Care home workers
8. People aged 80 or over
9. People aged 31-50
10. People with jobs that involve direct contact with members of the public
11. Schoolteachers

## GRID COLS

1. 1 – One of the first
2. 2
3. 3
4. 4
5. 5 – One of the last
6. They should not be offered a vaccine

**{ASK ALL}****C19VaccDoseImp [FLIP SCALE 1...4]**

“How important, if at all, do you think it is for people to get the second injection of the COVID-19 vaccine?”

\_WEB: “Please select one answer on every row”

\_TEL: “INTERVIEWER: READ OUT EACH STATEMENT AND THE ANSWER CODES. REPEAT ANSWER CODES AS REQUIRED.”

1. Very important
2. Fairly important
3. Not very important
4. Not at all important

**Covid-19 attitudes****{ASK ALL}**



**C19VaccAttQInt**

“The next set of questions will ask you about your views and experiences of COVID-19.

Some people may find these questions sensitive. Remember, you do not have to answer any questions you would prefer not to.”

DISPLAY

{ASK ALL}

**C19InfoEas [GRID; FLIP SCALE 1...5; RANDOMISE ROWS]**

“How easy or difficult do you find each of the following?”

\_WEB: “Please select one answer on every row”

\_TEL: “INTERVIEWER: READ OUT EACH STATEMENT AND THE ANSWER CODES. REPEAT ANSWER CODES AS REQUIRED.”

GRID ROWS

1. Finding information to help you make decisions about your health
2. Finding information about how to protect yourself and others from COVID-19
3. Finding information on what to do if you have symptoms of COVID-19
4. Understanding the current instructions and guidance on how to protect yourself and others from COVID-19

GRID COLS

1. Very easy
2. Fairly easy
3. Neither easy nor difficult
4. Fairly difficult
5. Very difficult
6. Not applicable

{ASK ALL}

**C19Diag**

“Have you been officially diagnosed with the coronavirus (COVID-19)?”

1. Yes
2. No
3. Don't know

{IF C19Diag <> 1}

**C19Had [FLIP SCALE 1...4]**

“Do you think you have ever had the coronavirus (COVID-19)?”

1. Yes – definitely
2. Yes - probably
3. No – probably not
4. No – definitely not
5. Don't know

{ASK ALL}

**C19Symp**

“Since January 2020, have you had coronavirus (COVID-19) symptoms?”

Symptoms can include a high temperature, a new continuous cough, or a loss of sense of smell or taste”

1. Yes
2. No
3. Don't know

{IF C19Symp = 1}

**C19SympSev [FLIP SCALE]**

“Would you say your symptoms were mild or severe?”

1. Mild
2. Severe

{ASK ALL}

**C19Oth**

“Do you have any friends or family who have had the coronavirus (COVID-19)?”

1. Yes
2. No

{IF C19Oth = 1}

**C19OthHosp**

“Have any of your friends or family had to go to hospital as a result of having the coronavirus (COVID-19)?”

1. Yes
2. No
3. Prefer not to say

{IF C19Oth = 1}

**C19OthDied**

“Have any of your friends or family died as a result of having the coronavirus (COVID-19)?”

1. Yes
2. No
3. Prefer not to say

{ASK ALL}

**C19Imp [FLIP SCALE]**

“Thinking about the impact the COVID-19 pandemic has had on different areas of your life...

How much of a negative impact, if any, would you say the COVID-19 pandemic has had on your life?”

\_WEB: “Please select one answer on every row”

\_TEL: “INTERVIEWER: READ OUT EACH STATEMENT AND THE ANSWER CODES. REPEAT ANSWER CODES AS REQUIRED.”

1. An extremely negative impact
2. A very negative impact
3. A somewhat negative impact
4. A slightly negative impact
5. It has not had a negative impact

{ASK ALL}

**C19Fut1 [FLIP SCALE 1-5]**

“How likely or unlikely do you think you are to get COVID-19 in the next 6 months?”

\_WEB: “Please select one answer on every row”

\_TEL: “INTERVIEWER: READ OUT EACH STATEMENT AND THE ANSWER CODES. REPEAT ANSWER CODES AS REQUIRED.”

1. Very likely
2. Quite likely
3. Neither likely nor unlikely
4. Quite unlikely
5. Very unlikely
6. Don't know

{ASK IF C19Fut = 6}  
C19Fut1DK [FLIP SCALE 1-5]  
Thank you for your response.

<b>We would really like to know your opinion on this, even if you are unsure or don't feel you have enough information.</b>

If you had to decide, how likely or unlikely do you think you are to get COVID-19 in the next 6 months?

\_WEB: "Please select one answer on every row"

\_TEL: "INTERVIEWER: READ OUT EACH STATEMENT AND THE ANSWER CODES. REPEAT ANSWER CODES AS REQUIRED."

1. Very likely
2. Quite likely
3. Neither likely nor unlikely
4. Quite unlikely
5. Very unlikely
6. I really don't know

{ASK ALL}  
C19Fut2 [FLIP SCALE 1-5]

If you did get COVID-19 in the next 6 months, how likely or unlikely do you think you would be to become seriously ill as a result of it?

\_WEB: "Please select one answer on every row"

\_TEL: "INTERVIEWER: READ OUT EACH STATEMENT AND THE ANSWER CODES. REPEAT ANSWER CODES AS REQUIRED."

1. Very likely
2. Quite likely
3. Neither likely nor unlikely
4. Quite unlikely
5. Very unlikely
6. Don't know

{ASK IF C19Fut2=6}  
C19Fut2DK [FLIP SCALE 1-5]

Thank you for your response.

<b>We would really like to know your opinion on this, even if you are unsure or don't feel you have enough information.</b>

If you had to decide, if you did get COVID-19 in the next 6 months, how likely or unlikely do you think you would be to become seriously ill as a result of it?

\_WEB: "Please select one answer on every row"

\_TEL: "INTERVIEWER: READ OUT EACH STATEMENT AND THE ANSWER CODES. REPEAT ANSWER CODES AS REQUIRED."

1. Very likely
2. Quite likely
3. Neither likely nor unlikely
4. Quite unlikely
5. Very unlikely
6. I really don't know

{ASK ALL}

**C19PryDon [GRID: RANDOMISE ROWS; FLIP SCALE 1...5]**

“How often do you currently do each of the following to help prevent the spread of COVID-19?”

\_WEB: “Please select one answer on every row”

\_TEL: “INTERVIEWER: READ OUT EACH STATEMENT AND THE ANSWER CODES. REPEAT ANSWER CODES AS REQUIRED.”

**GRID ROWS**

1. Try to stay physically distant from other people when I am out in public
2. Avoid crowded public places
3. Wash my hands with soap and water for at least 20 seconds
4. Wear a face covering whenever in shops or on public transport
5. Obey the rules about how many people from different households can meet indoors
6. Obey the rules about how many people from different households can meet outdoors
7. Register my contact details when I visit cafes, restaurants or bars

**GRID COLS**

1. Always
2. Often
3. Sometimes
4. Rarely
5. Never
6. Not applicable

{ASK ALL}

**C19Att [GRID: RANDOMISE ROWS; FLIP SCALE]**

To what extent do you agree or disagree with each of the following statements about COVID-19?

\_WEB: “Please select one answer on every row”

\_TEL: “INTERVIEWER: READ OUT EACH STATEMENT AND THE ANSWER CODES. REPEAT ANSWER CODES AS REQUIRED.”

**GRID ROWS**

1. Thinking about COVID-19 makes me feel worried
2. I am worried that I or people I care about will get sick from COVID-19
3. In general, the seriousness of COVID-19 is being exaggerated
4. COVID-19 feels like something far away from me
5. The {IF Cur\_Country = -1,1: “UK”; IF Cur\_Country = 2: “Scottish”; IF Cur\_Country = 3: “Welsh Assembly”} Government’s response to COVID-19 is doing more harm than the disease itself
6. COVID-19 is a hoax

**GRID COLS**

1. Strongly agree
2. Agree
3. Neither agree nor disagree
4. Disagree
5. Strongly disagree

{ASK ALL}

**C19Acc [GRID: RANDOMISE ROWS; FLIP SCALE]**

“How acceptable or unacceptable do you find each of the following options for addressing COVID-19 in the next 12 months?”

\_WEB: “Please select one answer on every row”

\_TEL: “INTERVIEWER: READ OUT EACH STATEMENT AND THE ANSWER CODES. REPEAT ANSWER CODES AS REQUIRED.”

**GRID ROWS**

1. Encouraging the general public to get vaccinated against COVID-19
2. Bringing in restrictions from time to time to stop the spread of COVID-19

3. Using test and trace systems to control the spread of COVID-19
4. Letting COVID-19 run its course through the population
5. Modifying our behaviour to live with COVID-19
6. Shielding of vulnerable people and letting everyone else get on with their lives

#### GRID COLS

1. Very acceptable
2. Somewhat acceptable
3. Neither acceptable nor unacceptable
4. Somewhat unacceptable
5. Very unacceptable

**Table S1 Overall response rate calculation accounting for recruitment onto original panel and panel attrition.**

| Wave of British Social Attitudes Survey (BSA) from which panel was recruited |            |            |            |                    |
|------------------------------------------------------------------------------|------------|------------|------------|--------------------|
| Response to initial BSA survey                                               | 2018       | 2019       | 2020       | Total 2018 to 2020 |
| BSA issued                                                                   | 10,270     | 7,956      | 42066      | 60,292             |
| BSA deadwood                                                                 | 1,023      | 684        | 4207       | 5,914              |
| BSA productive                                                               | 3,879      | 3,224      | 3964       | 11,067             |
| BSA response rate                                                            | 42%        | 44%        | 10%        | 20%                |
| <b>Overall response for panel recruitment</b>                                |            |            |            |                    |
| BSA productive                                                               | 3,879      | 3,224      | 3964       | 11,067             |
| Recruited to panel                                                           | 2,412      | 2,104      | 3086       | 7,602              |
| Panel recruitment rate                                                       | 62%        | 65%        | 78%        | 69%                |
| Panel deadwood                                                               | 19         | 7          | 0          | 26                 |
| Panel lost to attrition/inactivity prior to vaccine survey                   | 969        | 673        | 3          | 1645               |
| <b>Panel's response to vaccine survey</b>                                    |            |            |            |                    |
| Issued                                                                       | 1,424      | 1,424      | 3,083      | 5,931              |
| Deadwood                                                                     | 1          | 5          | 0          | 6                  |
| Achieved                                                                     | 1,242      | 1,181      | 2,555      | 4,978              |
| <b>Vaccine survey response rate</b>                                          | <b>87%</b> | <b>83%</b> | <b>83%</b> | <b>84%</b>         |
| <b>Overall survey response rate<sup>a</sup></b>                              | <b>13%</b> | <b>16%</b> | <b>7%</b>  | <b>9%</b>          |

<sup>a</sup> Response rate accounting for non-response at original point of recruitment (British Social Attitudes Survey 2018, 2019 or 2020; <http://bsa.natcen.ac.uk>) and panel attrition thereafter.

## Methods S2: Non-response weights

Non-response to NatCen's probability panel surveys can occur at any one of three stages: the survey used for recruitment to the panel (the British Social Attitudes survey), the invitation to join the panel (at the end of the BSA interview) and the survey of panel members itself. The BSA survey is already weighted to adjust for non-response and we compute further weights to take account of non-response at each of the two subsequent stages. The final weights are the product of these three weights. This three-stage approach is ideal because the correlates of non-response can be different at each stage. With this system we also can optimise the use of the data available from the British Social Attitudes Survey (BSA).

These are the three weights we have computed:

1. **BSA survey weight:** the panel members were recruited from BSA 2018, 2019 and 2020. The weighting process for BSA 2020 was a little different from the other years due to the change in methodology due to the COVID-19 pandemic (using a 'push-to-web' methodology, with up to two participants in a household allowed to take part). All three years required weights to adjust for differential selection probabilities (design weights), non-response at household level (non-response weights) and weights to adjust the profile of respondents to match population estimates (calibration weights). We now describe in more detail the approaches used in 2018/19 and 2020.

For 2018/2019, a non-response model was estimated to adjust for household level non-response. The model included region, dwelling type, percentage of owner-occupied properties in the postcode sector (grouped) and population density. The model produced a non-response weight, which was combined with the design weights (which accounted for unequal selection probabilities of households and individuals within households) to produce a composite weight. This weight was then adjusted using calibration weighting so that the profile of BSA respondents matches the British population in terms of age, sex and region.<sup>a</sup>

As above, the weighting process for BSA 2020 was a little different from previous years due to the methodology used. Two non-response models were created: one to adjust for household level non-response (as in previous years), and another to account for differential response within households. The first model included (grouped) census variables measuring percentage of owner occupied properties, percentage of adults with a degree and percentage of BAME individuals in the postcode sector, plus region and the geo-demographic Output Area Classification. The second model included region, household tenure, household income (grouped), number of eligible adults and IMD tertiles. Each model produced a non-response weight and these were combined to produce a composite weight. This weight was then adjusted using calibration weighting so that the profile of BSA respondents matches the GB population in terms of age, gender, highest educational qualification, tenure and region.

2. **Panel weight:** this weight accounts for non-response at the panel recruitment stage where some people interviewed as part of the BSA survey chose not to join the panel. A logistic regression model has been used to derive the probability of response of each panel member; the panel weight is computed as the inverse of the probabilities of response. This weight adjusts the panel for non-response using the following variables: age and sex groups, region, BSA year, household type, household income, education level, internet access, ethnicity, tenure, social class group, economic activity, political party identification, and interest in politics.<sup>b,c</sup> The resulting panel weight has been multiplied by the BSA weights, so the panel is representative of the population.
3. **Survey weight:** this weight is to adjust the bias caused by non-response to this particular panel survey. A logistic regression model has been used to compute the probabilities of response of each participant. The panel survey weight is equal to the inverse of the probabilities of response. The initial set of predictors used to build the model was the same as for the panel weight; and at this wave the final set of variables used was also the same. Unlike the model used to calculate the panel weight, no interaction term between BSA survey year and internet access was used. As this wave of data collection was web-only, there were only a very small number of panellists (from each year of BSA) who took part in the survey but did not have access to the internet when they were interviewed for BSA. It was therefore deemed inappropriate to include the interaction term in the model.

The final survey weight is the result of multiplying the survey weight by the compounded panel weight.

### Notes:

a. More details on the BSA weight can be found at <http://bsa.natcen.ac.uk/>

b. The characteristics that are likely to change with time for an individual and whose distribution differed between 2018 and 2020 BSA sample have been entered into the model in interaction with BSA year.

c. More details about these variables, the question wording and the full dataset can be found at <http://bsa.natcen.ac.uk/>

**Table S2 Doctors, nurses or other healthcare professionals – Association between trust in sources of information about COVID-19 vaccine and socio-demographic variables – (a) bivariate results and (b) multivariate logistic regression.**

|                                             | (a) Bivariate associations between socio-demographics and trusting COVID-19 vaccine info from Doctors, nurses or other healthcare professionals<br>% Trust completely or a great deal (weighted)<br>$\chi^2$ test for differences by demographics |      |               |       | (b) Logistic regression of trust in COVID-19 vaccine info from Doctors, nurses or other healthcare professionals<br>1 = Trust completely or a great deal (4104), 0 = Trust somewhat, very little or not at all (786)                            |      |              |              |       |
|---------------------------------------------|---------------------------------------------------------------------------------------------------------------------------------------------------------------------------------------------------------------------------------------------------|------|---------------|-------|-------------------------------------------------------------------------------------------------------------------------------------------------------------------------------------------------------------------------------------------------|------|--------------|--------------|-------|
|                                             | n                                                                                                                                                                                                                                                 | %    | $\chi^2$ (df) | P     | N                                                                                                                                                                                                                                               | AOR* | 95% CI Lower | 95% CI Upper | P     |
| <b>Gender</b>                               |                                                                                                                                                                                                                                                   |      |               |       |                                                                                                                                                                                                                                                 |      |              |              |       |
| Male                                        | 1957                                                                                                                                                                                                                                              | 81.7 | 3.020 (2)     | .221  | 2097                                                                                                                                                                                                                                            | ref  |              |              | .526  |
| Female                                      | 2046                                                                                                                                                                                                                                              | 79.9 |               |       | 2784                                                                                                                                                                                                                                            | 0.92 | 0.79         | 1.08         | .331  |
| Other                                       | 5                                                                                                                                                                                                                                                 | 71.4 |               |       | 9                                                                                                                                                                                                                                               | 0.59 | 0.12         | 2.94         | .518  |
| <b>Age</b>                                  |                                                                                                                                                                                                                                                   |      |               |       |                                                                                                                                                                                                                                                 |      |              |              |       |
| 18-29                                       | 649                                                                                                                                                                                                                                               | 78.8 | 53.883 (6)    | <.001 | 459                                                                                                                                                                                                                                             | ref  |              |              | <.001 |
| 30-39 v 18-29                               | 642                                                                                                                                                                                                                                               | 75.7 |               |       | 758                                                                                                                                                                                                                                             | 0.83 | 0.61         | 1.12         | .219  |
| 40-49 v 18-39                               | 629                                                                                                                                                                                                                                               | 78.4 |               |       | 835                                                                                                                                                                                                                                             | 0.96 | 0.76         | 1.22         | .750  |
| 50-59 v 18-49                               | 701                                                                                                                                                                                                                                               | 80.9 |               |       | 896                                                                                                                                                                                                                                             | 1.18 | 0.95         | 1.47         | .133  |
| 60-69 v 18-59                               | 599                                                                                                                                                                                                                                               | 84.2 |               |       | 1004                                                                                                                                                                                                                                            | 1.40 | 1.12         | 1.74         | .003  |
| 70-79 v 18-69                               | 582                                                                                                                                                                                                                                               | 89.0 |               |       | 761                                                                                                                                                                                                                                             | 1.72 | 1.32         | 2.24         | <.001 |
| 80+ v 18-79                                 | 181                                                                                                                                                                                                                                               | 83.0 |               |       | 177                                                                                                                                                                                                                                             | 1.32 | 0.83         | 2.11         | .240  |
| <b>Education/Highest qualification</b>      |                                                                                                                                                                                                                                                   |      |               |       |                                                                                                                                                                                                                                                 |      |              |              |       |
| No qualifications                           | 440                                                                                                                                                                                                                                               | 71.7 | 91.917 (4)    | <.001 | 408                                                                                                                                                                                                                                             | ref  |              |              | <.001 |
| Degree or equivalent and above              | 1775                                                                                                                                                                                                                                              | 85.7 |               |       | 2454                                                                                                                                                                                                                                            | 2.64 | 2.00         | 3.48         | <.001 |
| A levels / Vocational level 3 or equivalent | 906                                                                                                                                                                                                                                               | 80.0 |               |       | 990                                                                                                                                                                                                                                             | 1.87 | 1.39         | 2.51         | <.001 |
| Other qual'ns below A level / Voc level 3   | 673                                                                                                                                                                                                                                               | 80.5 |               |       | 783                                                                                                                                                                                                                                             | 1.70 | 1.25         | 2.29         | .001  |
| Other qualification                         | 210                                                                                                                                                                                                                                               | 69.1 |               |       | 255                                                                                                                                                                                                                                             | 0.97 | 0.67         | 1.40         | .872  |
| <b>Financial Status</b>                     |                                                                                                                                                                                                                                                   |      |               |       |                                                                                                                                                                                                                                                 |      |              |              |       |
| Living comfortably                          | 1121                                                                                                                                                                                                                                              | 87.2 | 124.251 (4)   | <.001 | 1533                                                                                                                                                                                                                                            | ref  |              |              | <.001 |
| Doing alright                               | 1699                                                                                                                                                                                                                                              | 83.7 |               |       | 1995                                                                                                                                                                                                                                            | 0.90 | 0.73         | 1.10         | .296  |
| Just about getting by                       | 824                                                                                                                                                                                                                                               | 72.9 |               |       | 959                                                                                                                                                                                                                                             | 0.61 | 0.48         | 0.77         | <.001 |
| Finding it quite difficult                  | 247                                                                                                                                                                                                                                               | 73.3 |               |       | 266                                                                                                                                                                                                                                             | 0.60 | 0.42         | 0.84         | .003  |
| Finding it very difficult                   | 116                                                                                                                                                                                                                                               | 66.7 |               |       | 137                                                                                                                                                                                                                                             | 0.51 | 0.33         | 0.78         | .002  |
| <b>Country</b>                              |                                                                                                                                                                                                                                                   |      |               |       |                                                                                                                                                                                                                                                 |      |              |              |       |
| England                                     | 3499                                                                                                                                                                                                                                              | 81.7 | 21.523 (2)    | <.001 | 4299                                                                                                                                                                                                                                            | ref  |              |              | .128  |
| Scotland                                    | 321                                                                                                                                                                                                                                               | 73.0 |               |       | 383                                                                                                                                                                                                                                             | 0.77 | 0.59         | 1.02         | .068  |
| Wales                                       | 183                                                                                                                                                                                                                                               | 77.2 |               |       | 208                                                                                                                                                                                                                                             | 0.82 | 0.56         | 1.20         | .308  |
| <b>Urban/rural</b>                          |                                                                                                                                                                                                                                                   |      |               |       |                                                                                                                                                                                                                                                 |      |              |              |       |
| Urban                                       | 3201                                                                                                                                                                                                                                              | 80.1 | 4.443 (1)     | .035  | 3725                                                                                                                                                                                                                                            | ref  |              |              |       |
| Rural                                       | 802                                                                                                                                                                                                                                               | 83.1 |               |       | 1165                                                                                                                                                                                                                                            | 0.97 | 0.80         | 1.18         | .778  |
| <b>Ethnicity</b>                            |                                                                                                                                                                                                                                                   |      |               |       |                                                                                                                                                                                                                                                 |      |              |              |       |
| White British                               | 3314                                                                                                                                                                                                                                              | 83.0 | 63.871 (5)    | <.001 | 4224                                                                                                                                                                                                                                            | ref  |              |              | <.001 |
| Any other white background                  | 242                                                                                                                                                                                                                                               | 72.7 |               |       | 317                                                                                                                                                                                                                                             | 0.54 | 0.41         | 0.72         | <.001 |
| Mixed or multiple ethnic groups             | 64                                                                                                                                                                                                                                                | 66.0 |               |       | 62                                                                                                                                                                                                                                              | 0.38 | 0.22         | 0.67         | <.001 |
| Asian or Asian British                      | 223                                                                                                                                                                                                                                               | 73.4 |               |       | 160                                                                                                                                                                                                                                             | 0.53 | 0.36         | 0.77         | <.001 |
| Black or Black British                      | 70                                                                                                                                                                                                                                                | 69.3 |               |       | 67                                                                                                                                                                                                                                              | 0.41 | 0.24         | 0.70         | .001  |
| Other                                       | 58                                                                                                                                                                                                                                                | 71.6 |               |       | 60                                                                                                                                                                                                                                              | 0.56 | 0.30         | 1.03         | .060  |
|                                             |                                                                                                                                                                                                                                                   |      |               |       | Hosmer & Lemeshow $\chi^2= 10.236$ , df=8, p=0.249.<br>Final model $\chi^2=220.263$ , df=24, p<0.001<br>Nagelkerke = 0.075<br>Cases correctly classified: 84.0%.<br>88 cases excluded due to missing data on one or more independent variables. |      |              |              |       |

\* adjusted for all other variables in the model, AOR, adjusted odds ratio; ref, reference category; 95% CI, 95% confidence interval.



**Table S3 Pharmacists – Association between trust in sources of information about COVID-19 vaccine and socio-demographic variables – (a) bivariate results and (b) multivariate logistic regression.**

|                                             | (a) Bivariate associations between socio-demographics and trusting COVID-19 vaccine info from Pharmacists<br>% Trust completely or a great deal (weighted)<br>$\chi^2$ test for differences by demographics |      |                    |       | (b) Logistic regression of trust in COVID-19 vaccine info from Pharmacists<br>1 = Trust completely or a great deal (3107), 0 = Trust somewhat, very little or not at all (1786)                                                                |      |              |              |       |
|---------------------------------------------|-------------------------------------------------------------------------------------------------------------------------------------------------------------------------------------------------------------|------|--------------------|-------|------------------------------------------------------------------------------------------------------------------------------------------------------------------------------------------------------------------------------------------------|------|--------------|--------------|-------|
|                                             | n                                                                                                                                                                                                           | %    | $\chi^2$ (df)      | P     | N                                                                                                                                                                                                                                              | AOR* | 95% CI Lower | 95% CI Upper | P     |
| <b>Gender</b>                               |                                                                                                                                                                                                             |      |                    |       |                                                                                                                                                                                                                                                |      |              |              |       |
| Male                                        | 1420                                                                                                                                                                                                        | 59.2 | 1.597 <sup>#</sup> | .474  | 2098                                                                                                                                                                                                                                           | ref  |              |              | .620  |
| Female                                      | 1548                                                                                                                                                                                                        | 60.4 |                    |       | 2786                                                                                                                                                                                                                                           | 1.06 | 0.94         | 1.19         | .376  |
| Other                                       | 3                                                                                                                                                                                                           | 42.9 |                    |       | 9                                                                                                                                                                                                                                              | 0.78 | 0.21         | 2.95         | .715  |
| <b>Age</b>                                  |                                                                                                                                                                                                             |      |                    |       |                                                                                                                                                                                                                                                |      |              |              |       |
| 18-29                                       | 461                                                                                                                                                                                                         | 55.9 | 29.783 (6)         | <.001 | 459                                                                                                                                                                                                                                            | ref  |              |              | .092  |
| 30-39 v 18-29                               | 486                                                                                                                                                                                                         | 57.2 |                    |       | 759                                                                                                                                                                                                                                            | 0.98 | 0.77         | 1.24         | .848  |
| 40-49 v 18-39                               | 455                                                                                                                                                                                                         | 56.7 |                    |       | 835                                                                                                                                                                                                                                            | 0.96 | 0.80         | 1.16         | .662  |
| 50-59 v 18-49                               | 518                                                                                                                                                                                                         | 59.7 |                    |       | 896                                                                                                                                                                                                                                            | 1.18 | 0.99         | 1.39         | .062  |
| 60-69 v 18-59                               | 462                                                                                                                                                                                                         | 65.0 |                    |       | 1004                                                                                                                                                                                                                                           | 1.24 | 1.06         | 1.46         | .009  |
| 70-79 v 18-69                               | 428                                                                                                                                                                                                         | 65.1 |                    |       | 763                                                                                                                                                                                                                                            | 1.00 | 0.84         | 1.19         | .972  |
| 80+ v 18-79                                 | 144                                                                                                                                                                                                         | 65.8 |                    |       | 177                                                                                                                                                                                                                                            | 1.12 | 0.80         | 1.55         | .514  |
| <b>Education/Highest qualification</b>      |                                                                                                                                                                                                             |      |                    |       |                                                                                                                                                                                                                                                |      |              |              |       |
| No qualifications                           | 349                                                                                                                                                                                                         | 56.7 | 25.123 (4)         | <.001 | 410                                                                                                                                                                                                                                            | ref  |              |              | <.001 |
| Degree or equivalent and above              | 1305                                                                                                                                                                                                        | 63.0 |                    |       | 2454                                                                                                                                                                                                                                           | 1.34 | 1.07         | 1.67         | .012  |
| A levels / Vocational level 3 or equivalent | 680                                                                                                                                                                                                         | 60.1 |                    |       | 990                                                                                                                                                                                                                                            | 1.20 | 0.94         | 1.53         | .146  |
| Other qual'ns below A level / Voc level 3   | 485                                                                                                                                                                                                         | 57.9 |                    |       | 784                                                                                                                                                                                                                                            | 1.02 | 0.79         | 1.31         | .890  |
| Other qualification                         | 151                                                                                                                                                                                                         | 49.8 |                    |       | 255                                                                                                                                                                                                                                            | 0.82 | 0.59         | 1.13         | .216  |
| <b>Financial Status</b>                     |                                                                                                                                                                                                             |      |                    |       |                                                                                                                                                                                                                                                |      |              |              |       |
| Living comfortably                          | 883                                                                                                                                                                                                         | 68.7 | 78.993 (4)         | <.001 | 1533                                                                                                                                                                                                                                           | ref  |              |              | <.001 |
| Doing alright                               | 1220                                                                                                                                                                                                        | 60.0 |                    |       | 1997                                                                                                                                                                                                                                           | 0.77 | 0.66         | 0.89         | <.001 |
| Just about getting by                       | 607                                                                                                                                                                                                         | 53.6 |                    |       | 960                                                                                                                                                                                                                                            | 0.63 | 0.53         | 0.75         | <.001 |
| Finding it quite difficult                  | 178                                                                                                                                                                                                         | 52.8 |                    |       | 266                                                                                                                                                                                                                                            | 0.62 | 0.47         | 0.82         | .001  |
| Finding it very difficult                   | 81                                                                                                                                                                                                          | 46.8 |                    |       | 137                                                                                                                                                                                                                                            | 0.51 | 0.35         | 0.73         | <.001 |
| <b>Country</b>                              |                                                                                                                                                                                                             |      |                    |       |                                                                                                                                                                                                                                                |      |              |              |       |
| England                                     | 2589                                                                                                                                                                                                        | 60.4 | 7.095 (2)          | .029  | 4301                                                                                                                                                                                                                                           | ref  |              |              | .673  |
| Scotland                                    | 239                                                                                                                                                                                                         | 54.1 |                    |       | 384                                                                                                                                                                                                                                            | 0.91 | 0.73         | 1.13         | .403  |
| Wales                                       | 137                                                                                                                                                                                                         | 57.8 |                    |       | 208                                                                                                                                                                                                                                            | 0.95 | 0.71         | 1.27         | .721  |
| <b>Urban/rural</b>                          |                                                                                                                                                                                                             |      |                    |       |                                                                                                                                                                                                                                                |      |              |              |       |
| Urban                                       | 2349                                                                                                                                                                                                        | 58.7 | 8.096 (1)          | .004  | 3728                                                                                                                                                                                                                                           |      |              |              |       |
| Rural                                       | 615                                                                                                                                                                                                         | 63.7 |                    |       | 1165                                                                                                                                                                                                                                           | 1.04 | 0.90         | 1.20         | .599  |
| <b>Ethnicity</b>                            |                                                                                                                                                                                                             |      |                    |       |                                                                                                                                                                                                                                                |      |              |              |       |
| White British                               | 2516                                                                                                                                                                                                        | 62.9 | 91.005 (5)         | <.001 | 4226                                                                                                                                                                                                                                           | ref  |              |              | <.001 |
| Any other white background                  | 157                                                                                                                                                                                                         | 46.7 |                    |       | 318                                                                                                                                                                                                                                            | 0.57 | 0.45         | 0.72         | <.001 |
| Mixed or multiple ethnic groups             | 39                                                                                                                                                                                                          | 40.2 |                    |       | 62                                                                                                                                                                                                                                             | 0.42 | 0.25         | 0.70         | <.001 |
| Asian or Asian British                      | 142                                                                                                                                                                                                         | 46.6 |                    |       | 160                                                                                                                                                                                                                                            | 0.47 | 0.34         | 0.65         | <.001 |
| Black or Black British                      | 51                                                                                                                                                                                                          | 50.5 |                    |       | 67                                                                                                                                                                                                                                             | 0.63 | 0.39         | 1.03         | .067  |
| Other                                       | 35                                                                                                                                                                                                          | 43.2 |                    |       | 60                                                                                                                                                                                                                                             | 0.48 | 0.29         | 0.81         | .006  |
|                                             |                                                                                                                                                                                                             |      |                    |       | Hosmer & Lemeshow $\chi^2= 11.453$ , df=8, p=0.177.<br>Final model $\chi^2=157.815$ , df=24, p<0.001<br>Nagelkerke = .043<br>Cases correctly classified: 64.5%.<br>85 cases excluded due to missing data on one or more independent variables. |      |              |              |       |

\* adjusted for all other variables in the model, AOR, adjusted odds ratio; ref, reference category; 95% CI, 95% confidence interval. <sup>#</sup> Fisher-Freeman-Halton Exact Test.

**Table S4 The NHS – Association between trust in sources of information about COVID-19 vaccine and socio-demographic variables – (a) bivariate results and (b) multivariate logistic regression.**

|                                             | (a) Bivariate associations between socio-demographics and trusting COVID-19 vaccine info from the NHS<br>% Trust completely or a great deal (weighted)<br>$\chi^2$ test for differences by demographics |      |               |       | (b) Logistic regression of trust in COVID-19 vaccine info from the NHS<br>1 = Trust completely or a great deal (4115), 0 = Trust somewhat, very little or not at all (775)                                                                    |      |              |              |       |
|---------------------------------------------|---------------------------------------------------------------------------------------------------------------------------------------------------------------------------------------------------------|------|---------------|-------|-----------------------------------------------------------------------------------------------------------------------------------------------------------------------------------------------------------------------------------------------|------|--------------|--------------|-------|
|                                             | n                                                                                                                                                                                                       | %    | $\chi^2$ (df) | P     | N                                                                                                                                                                                                                                             | AOR* | 95% CI Lower | 95% CI Upper | P     |
| <b>Gender</b>                               |                                                                                                                                                                                                         |      |               |       |                                                                                                                                                                                                                                               |      |              |              |       |
| Male                                        | 1926                                                                                                                                                                                                    | 80.3 | 1.598 (2)     | .450  | 2097                                                                                                                                                                                                                                          | ref  |              |              | .461  |
| Female                                      | 2055                                                                                                                                                                                                    | 80.2 |               |       | 2784                                                                                                                                                                                                                                          | 0.97 | 0.82         | 1.14         | .718  |
| Other                                       | 5                                                                                                                                                                                                       | 62.5 |               |       | 9                                                                                                                                                                                                                                             | 0.41 | 0.10         | 1.74         | .225  |
| <b>Age</b>                                  |                                                                                                                                                                                                         |      |               |       |                                                                                                                                                                                                                                               |      |              |              |       |
| 18-29                                       | 609                                                                                                                                                                                                     | 73.9 | 106.785 (6)   | <.001 | 459                                                                                                                                                                                                                                           | ref  |              |              | <.001 |
| 30-39 v 18-29                               | 632                                                                                                                                                                                                     | 74.4 |               |       | 759                                                                                                                                                                                                                                           | 0.94 | 0.70         | 1.26         | .672  |
| 40-49 v 18-39                               | 618                                                                                                                                                                                                     | 77.1 |               |       | 834                                                                                                                                                                                                                                           | 1.05 | 0.84         | 1.32         | .672  |
| 50-59 v 18-49                               | 710                                                                                                                                                                                                     | 81.9 |               |       | 895                                                                                                                                                                                                                                           | 1.45 | 1.16         | 1.81         | .001  |
| 60-69 v 18-59                               | 609                                                                                                                                                                                                     | 85.7 |               |       | 1004                                                                                                                                                                                                                                          | 1.62 | 1.29         | 2.03         | <.001 |
| 70-79 v 18-69                               | 593                                                                                                                                                                                                     | 90.5 |               |       | 762                                                                                                                                                                                                                                           | 1.99 | 1.50         | 2.63         | <.001 |
| 80+ v 18-79                                 | 186                                                                                                                                                                                                     | 85.3 |               |       | 177                                                                                                                                                                                                                                           | 1.66 | 0.99         | 2.79         | .056  |
| <b>Education/Highest qualification</b>      |                                                                                                                                                                                                         |      |               |       |                                                                                                                                                                                                                                               |      |              |              |       |
| No qualifications                           | 447                                                                                                                                                                                                     | 72.6 | 60.407 (4)    | <.001 | 410                                                                                                                                                                                                                                           | ref  |              |              | <.001 |
| Degree or equivalent and above              | 1733                                                                                                                                                                                                    | 83.7 |               |       | 2452                                                                                                                                                                                                                                          | 2.39 | 1.80         | 3.16         | <.001 |
| A levels / Vocational level 3 or equivalent | 909                                                                                                                                                                                                     | 80.4 |               |       | 990                                                                                                                                                                                                                                           | 1.95 | 1.44         | 2.64         | <.001 |
| Other qual'ns below A level / Voc level 3   | 679                                                                                                                                                                                                     | 81.2 |               |       | 783                                                                                                                                                                                                                                           | 1.78 | 1.30         | 2.43         | <.001 |
| Other qualification                         | 211                                                                                                                                                                                                     | 69.6 |               |       | 255                                                                                                                                                                                                                                           | 0.95 | 0.65         | 1.39         | .805  |
| <b>Financial Status</b>                     |                                                                                                                                                                                                         |      |               |       |                                                                                                                                                                                                                                               |      |              |              |       |
| Living comfortably                          | 1136                                                                                                                                                                                                    | 88.3 | 167.221 (4)   | <.001 | 1533                                                                                                                                                                                                                                          | ref  |              |              | <.001 |
| Doing alright                               | 1675                                                                                                                                                                                                    | 82.4 |               |       | 1996                                                                                                                                                                                                                                          | 0.74 | 0.59         | 0.92         | .006  |
| Just about getting by                       | 823                                                                                                                                                                                                     | 72.8 |               |       | 958                                                                                                                                                                                                                                           | 0.47 | 0.37         | 0.60         | <.001 |
| Finding it quite difficult                  | 248                                                                                                                                                                                                     | 73.6 |               |       | 266                                                                                                                                                                                                                                           | 0.51 | 0.36         | 0.72         | <.001 |
| Finding it very difficult                   | 99                                                                                                                                                                                                      | 56.9 |               |       | 137                                                                                                                                                                                                                                           | 0.31 | 0.21         | 0.47         | <.001 |
| <b>Country</b>                              |                                                                                                                                                                                                         |      |               |       |                                                                                                                                                                                                                                               |      |              |              |       |
| England                                     | 3459                                                                                                                                                                                                    | 80.8 | 6.736 (2)     | .034  | 4298                                                                                                                                                                                                                                          | ref  |              |              | .505  |
| Scotland                                    | 345                                                                                                                                                                                                     | 78.1 |               |       | 384                                                                                                                                                                                                                                           | 0.98 | 0.73         | 1.32         | .900  |
| Wales                                       | 177                                                                                                                                                                                                     | 74.7 |               |       | 208                                                                                                                                                                                                                                           | 0.80 | 0.54         | 1.17         | .243  |
| <b>Urban/rural</b>                          |                                                                                                                                                                                                         |      |               |       |                                                                                                                                                                                                                                               |      |              |              |       |
| Urban                                       | 3165                                                                                                                                                                                                    | 79.2 | 14.722 (1)    | <.001 | 3725                                                                                                                                                                                                                                          |      |              |              |       |
| Rural                                       | 817                                                                                                                                                                                                     | 84.7 |               |       | 1165                                                                                                                                                                                                                                          | 1.03 | 0.84         | 1.26         | .791  |
| <b>Ethnicity</b>                            |                                                                                                                                                                                                         |      |               |       |                                                                                                                                                                                                                                               |      |              |              |       |
| White British                               | 3331                                                                                                                                                                                                    | 83.3 | 126.307 (5)   | <.001 | 4225                                                                                                                                                                                                                                          | ref  |              |              | <.001 |
| Any other white background                  | 224                                                                                                                                                                                                     | 67.3 |               |       | 317                                                                                                                                                                                                                                           | 0.47 | 0.36         | 0.63         | <.001 |
| Mixed or multiple ethnic groups             | 67                                                                                                                                                                                                      | 69.1 |               |       | 62                                                                                                                                                                                                                                            | 0.48 | 0.27         | 0.86         | .014  |
| Asian or Asian British                      | 207                                                                                                                                                                                                     | 68.1 |               |       | 160                                                                                                                                                                                                                                           | 0.57 | 0.39         | 0.84         | .004  |
| Black or Black British                      | 60                                                                                                                                                                                                      | 60.0 |               |       | 66                                                                                                                                                                                                                                            | 0.38 | 0.22         | 0.65         | <.001 |
| Other                                       | 57                                                                                                                                                                                                      | 70.4 |               |       | 60                                                                                                                                                                                                                                            | 0.45 | 0.25         | 0.81         | .008  |
|                                             |                                                                                                                                                                                                         |      |               |       | Hosmer & Lemeshow $\chi^2= 8.677$ , df=8, p=0.370.<br>Final model $\chi^2=291.002$ , df=24, p<0.001<br>Nagelkerke = .099<br>Cases correctly classified: 84.3%.<br>88 cases excluded due to missing data on one or more independent variables. |      |              |              |       |

\* adjusted for all other variables in the model, AOR, adjusted odds ratio; ref, reference category; 95% CI, 95% confidence interval.

**Table S5 Drug companies who manufacture vaccines – Association between trust in sources of information about COVID-19 vaccine and socio-demographic variables – (a) bivariate results and (b) multivariate logistic regression.**

|                                             | (a) Bivariate associations between socio-demographics and trusting COVID-19 vaccine info from drug companies who manufacture vaccines<br>% Trust completely or a great deal (weighted)<br>$\chi^2$ test for differences by demographics |      |                     |       | (b) Logistic regression of trust in COVID-19 vaccine info from drug companies who manufacture vaccines<br>1 = Trust completely or a great deal (1416), 0 = Trust somewhat, very little or not at all (3473)                                 |      |              |              |       |
|---------------------------------------------|-----------------------------------------------------------------------------------------------------------------------------------------------------------------------------------------------------------------------------------------|------|---------------------|-------|---------------------------------------------------------------------------------------------------------------------------------------------------------------------------------------------------------------------------------------------|------|--------------|--------------|-------|
|                                             | n                                                                                                                                                                                                                                       | %    | $\chi^2$ (df)       | P     | N                                                                                                                                                                                                                                           | AOR* | 95% CI Lower | 95% CI Upper | P     |
| <b>Gender</b>                               |                                                                                                                                                                                                                                         |      |                     |       |                                                                                                                                                                                                                                             |      |              |              |       |
| Male                                        | 652                                                                                                                                                                                                                                     | 27.2 | 16.276 <sup>#</sup> | <.001 | 2096                                                                                                                                                                                                                                        | ref  |              |              | <.001 |
| Female                                      | 819                                                                                                                                                                                                                                     | 32.0 |                     |       | 2784                                                                                                                                                                                                                                        | 1.28 | 1.12         | 1.45         | <.001 |
| Other                                       | 0                                                                                                                                                                                                                                       | 0.0  |                     |       | 9                                                                                                                                                                                                                                           | 0.00 | 0.00         | .            | .999  |
| <b>Age</b>                                  |                                                                                                                                                                                                                                         |      |                     |       |                                                                                                                                                                                                                                             |      |              |              |       |
| 18-29                                       | 264                                                                                                                                                                                                                                     | 32.0 | 32.180 (6)          | <.001 | 459                                                                                                                                                                                                                                         | ref  |              |              | .030  |
| 30-39 v 18-29                               | 249                                                                                                                                                                                                                                     | 29.3 |                     |       | 759                                                                                                                                                                                                                                         | 0.91 | 0.71         | 1.18         | .480  |
| 40-49 v 18-39                               | 196                                                                                                                                                                                                                                     | 24.5 |                     |       | 834                                                                                                                                                                                                                                         | 0.72 | 0.59         | 0.89         | .002  |
| 50-59 v 18-49                               | 226                                                                                                                                                                                                                                     | 26.1 |                     |       | 896                                                                                                                                                                                                                                         | 0.87 | 0.72         | 1.04         | .120  |
| 60-69 v 18-59                               | 219                                                                                                                                                                                                                                     | 30.8 |                     |       | 1004                                                                                                                                                                                                                                        | 0.96 | 0.81         | 1.13         | .613  |
| 70-79 v 18-69                               | 233                                                                                                                                                                                                                                     | 35.6 |                     |       | 760                                                                                                                                                                                                                                         | 1.12 | 0.94         | 1.34         | .204  |
| 80+ v 18-79                                 | 76                                                                                                                                                                                                                                      | 34.7 |                     |       | 177                                                                                                                                                                                                                                         | 1.02 | 0.73         | 1.42         | .905  |
| <b>Education/Highest qualification</b>      |                                                                                                                                                                                                                                         |      |                     |       |                                                                                                                                                                                                                                             |      |              |              |       |
| No qualifications                           | 217                                                                                                                                                                                                                                     | 35.3 | 17.807 (4)          | .001  | 408                                                                                                                                                                                                                                         | ref  |              |              | .004  |
| Degree or equivalent and above              | 569                                                                                                                                                                                                                                     | 27.5 |                     |       | 2454                                                                                                                                                                                                                                        | 0.72 | 0.57         | 0.92         | .007  |
| A levels / Vocational level 3 or equivalent | 321                                                                                                                                                                                                                                     | 28.4 |                     |       | 990                                                                                                                                                                                                                                         | 0.78 | 0.60         | 1.01         | .057  |
| Other qual'ns below A level / Voc level 3   | 267                                                                                                                                                                                                                                     | 31.9 |                     |       | 783                                                                                                                                                                                                                                         | 0.97 | 0.75         | 1.26         | .844  |
| Other qualification                         | 97                                                                                                                                                                                                                                      | 32.1 |                     |       | 254                                                                                                                                                                                                                                         | 0.94 | 0.67         | 1.32         | .732  |
| <b>Financial Status</b>                     |                                                                                                                                                                                                                                         |      |                     |       |                                                                                                                                                                                                                                             |      |              |              |       |
| Living comfortably                          | 444                                                                                                                                                                                                                                     | 34.5 | 20.183 (4)          | <.001 | 1533                                                                                                                                                                                                                                        | ref  |              |              | <.001 |
| Doing alright                               | 565                                                                                                                                                                                                                                     | 27.8 |                     |       | 1995                                                                                                                                                                                                                                        | 0.72 | 0.62         | 0.83         | <.001 |
| Just about getting by                       | 313                                                                                                                                                                                                                                     | 27.7 |                     |       | 958                                                                                                                                                                                                                                         | 0.66 | 0.55         | 0.80         | <.001 |
| Finding it quite difficult                  | 98                                                                                                                                                                                                                                      | 29.0 |                     |       | 266                                                                                                                                                                                                                                         | 0.74 | 0.55         | 1.00         | .054  |
| Finding it very difficult                   | 50                                                                                                                                                                                                                                      | 29.1 |                     |       | 137                                                                                                                                                                                                                                         | 0.55 | 0.36         | 0.85         | .007  |
| <b>Country</b>                              |                                                                                                                                                                                                                                         |      |                     |       |                                                                                                                                                                                                                                             |      |              |              |       |
| England                                     | 1259                                                                                                                                                                                                                                    | 29.4 | 2.325 (2)           | .313  | 4297                                                                                                                                                                                                                                        | ref  |              |              | .842  |
| Scotland                                    | 130                                                                                                                                                                                                                                     | 29.3 |                     |       | 384                                                                                                                                                                                                                                         | 1.00 | 0.79         | 1.26         | .996  |
| Wales                                       | 81                                                                                                                                                                                                                                      | 34.0 |                     |       | 208                                                                                                                                                                                                                                         | 1.10 | 0.81         | 1.49         | .559  |
| <b>Urban/rural</b>                          |                                                                                                                                                                                                                                         |      |                     |       |                                                                                                                                                                                                                                             |      |              |              |       |
| Urban                                       | 1187                                                                                                                                                                                                                                    | 29.7 | .092 (1)            | .762  | 3724                                                                                                                                                                                                                                        |      |              |              |       |
| Rural                                       | 282                                                                                                                                                                                                                                     | 29.2 |                     |       | 1165                                                                                                                                                                                                                                        | 0.99 | 0.85         | 1.15         | .868  |
| <b>Ethnicity</b>                            |                                                                                                                                                                                                                                         |      |                     |       |                                                                                                                                                                                                                                             |      |              |              |       |
| White British                               | 1234                                                                                                                                                                                                                                    | 30.9 | 29.028 (5)          | <.001 | 4223                                                                                                                                                                                                                                        | ref  |              |              | .012  |
| Any other white background                  | 70                                                                                                                                                                                                                                      | 20.9 |                     |       | 318                                                                                                                                                                                                                                         | 0.63 | 0.48         | 0.84         | .002  |
| Mixed or multiple ethnic groups             | 20                                                                                                                                                                                                                                      | 20.6 |                     |       | 62                                                                                                                                                                                                                                          | 0.92 | 0.52         | 1.62         | .769  |
| Asian or Asian British                      | 83                                                                                                                                                                                                                                      | 27.2 |                     |       | 160                                                                                                                                                                                                                                         | 0.74 | 0.50         | 1.08         | .119  |
| Black or Black British                      | 35                                                                                                                                                                                                                                      | 34.7 |                     |       | 67                                                                                                                                                                                                                                          | 1.11 | 0.64         | 1.91         | .714  |
| Other                                       | 12                                                                                                                                                                                                                                      | 15.2 |                     |       | 59                                                                                                                                                                                                                                          | 0.55 | 0.28         | 1.07         | .078  |
|                                             |                                                                                                                                                                                                                                         |      |                     |       | Hosmer & Lemeshow $\chi^2=9.180$ , df=8, p=0.327.<br>Final model $\chi^2=96.401$ , df=24, p<0.001<br>Nagelkerke = .028<br>Cases correctly classified: 71.0%.<br>89 cases excluded due to missing data on one or more independent variables. |      |              |              |       |

\* adjusted for all other variables in the model, AOR, adjusted odds ratio; ref, reference category; 95% CI, 95% confidence interval. # Fisher-Freeman-Halton Exact Test.

**Table S6 The UK Government – Association between trust in sources of information about COVID-19 vaccine and socio-demographic variables – (a) bivariate results and (b) multivariate logistic regression.**

|                                             | (a) Bivariate associations between socio-demographics and trusting COVID-19 vaccine info from the UK Government<br>% Trust completely or a great deal (weighted)<br>$\chi^2$ test for differences by demographics |      |                     |       | (b) Logistic regression of trust in COVID-19 vaccine info from the UK Government<br>1 = Trust completely or a great deal (2279), 0 = Trust somewhat, very little or not at all (2607)                                                         |      |              |              |       |
|---------------------------------------------|-------------------------------------------------------------------------------------------------------------------------------------------------------------------------------------------------------------------|------|---------------------|-------|-----------------------------------------------------------------------------------------------------------------------------------------------------------------------------------------------------------------------------------------------|------|--------------|--------------|-------|
|                                             | n                                                                                                                                                                                                                 | %    | $\chi^2$ (df)       | P     | N                                                                                                                                                                                                                                             | AOR* | 95% CI Lower | 95% CI Upper | P     |
| <b>Gender</b>                               |                                                                                                                                                                                                                   |      |                     |       |                                                                                                                                                                                                                                               |      |              |              |       |
| Male                                        | 1114                                                                                                                                                                                                              | 46.6 | 10.393 <sup>#</sup> | .005  | 2096                                                                                                                                                                                                                                          | ref  |              |              | .012  |
| Female                                      | 1080                                                                                                                                                                                                              | 42.3 |                     |       | 2781                                                                                                                                                                                                                                          | 0.84 | 0.75         | 0.95         | .004  |
| Other                                       | 2                                                                                                                                                                                                                 | 25.0 |                     |       | 9                                                                                                                                                                                                                                             | 0.47 | 0.09         | 2.37         | .363  |
| <b>Age</b>                                  |                                                                                                                                                                                                                   |      |                     |       |                                                                                                                                                                                                                                               |      |              |              |       |
| 18-29                                       | 261                                                                                                                                                                                                               | 31.9 | 182.080 (6)         | <.001 | 458                                                                                                                                                                                                                                           | ref  |              |              | <.001 |
| 30-39 v 18-29                               | 290                                                                                                                                                                                                               | 34.2 |                     |       | 758                                                                                                                                                                                                                                           | 1.14 | 0.89         | 1.47         | .289  |
| 40-49 v 18-39                               | 332                                                                                                                                                                                                               | 41.5 |                     |       | 834                                                                                                                                                                                                                                           | 1.37 | 1.14         | 1.65         | <.001 |
| 50-59 v 18-49                               | 416                                                                                                                                                                                                               | 48.0 |                     |       | 895                                                                                                                                                                                                                                           | 1.67 | 1.41         | 1.97         | <.001 |
| 60-69 v 18-59                               | 373                                                                                                                                                                                                               | 52.8 |                     |       | 1003                                                                                                                                                                                                                                          | 1.46 | 1.25         | 1.70         | <.001 |
| 70-79 v 18-69                               | 383                                                                                                                                                                                                               | 58.6 |                     |       | 762                                                                                                                                                                                                                                           | 1.65 | 1.40         | 1.96         | <.001 |
| 80+ v 18-79                                 | 124                                                                                                                                                                                                               | 57.1 |                     |       | 176                                                                                                                                                                                                                                           | 1.54 | 1.13         | 2.11         | .007  |
| <b>Education/Highest qualification</b>      |                                                                                                                                                                                                                   |      |                     |       |                                                                                                                                                                                                                                               |      |              |              |       |
| No qualifications                           | 269                                                                                                                                                                                                               | 43.7 | 2.856 (4)           | .582  | 410                                                                                                                                                                                                                                           | ref  |              |              | .439  |
| Degree or equivalent and above              | 924                                                                                                                                                                                                               | 44.8 |                     |       | 2450                                                                                                                                                                                                                                          | 0.95 | 0.76         | 1.18         | .622  |
| A levels / Vocational level 3 or equivalent | 482                                                                                                                                                                                                               | 42.6 |                     |       | 990                                                                                                                                                                                                                                           | 1.04 | 0.82         | 1.33         | .733  |
| Other qual'ns below A level / Voc level 3   | 386                                                                                                                                                                                                               | 46.2 |                     |       | 783                                                                                                                                                                                                                                           | 1.07 | 0.83         | 1.37         | .601  |
| Other qualification                         | 134                                                                                                                                                                                                               | 45.1 |                     |       | 253                                                                                                                                                                                                                                           | 1.14 | 0.83         | 1.58         | .422  |
| <b>Financial Status</b>                     |                                                                                                                                                                                                                   |      |                     |       |                                                                                                                                                                                                                                               |      |              |              |       |
| Living comfortably                          | 704                                                                                                                                                                                                               | 54.8 | 94.512 (4)          | <.001 | 1533                                                                                                                                                                                                                                          | ref  |              |              | <.001 |
| Doing alright                               | 891                                                                                                                                                                                                               | 43.9 |                     |       | 1994                                                                                                                                                                                                                                          | 0.76 | 0.66         | 0.87         | <.001 |
| Just about getting by                       | 415                                                                                                                                                                                                               | 36.9 |                     |       | 957                                                                                                                                                                                                                                           | 0.54 | 0.45         | 0.64         | <.001 |
| Finding it quite difficult                  | 124                                                                                                                                                                                                               | 36.9 |                     |       | 266                                                                                                                                                                                                                                           | 0.55 | 0.42         | 0.73         | <.001 |
| Finding it very difficult                   | 60                                                                                                                                                                                                                | 36.1 |                     |       | 136                                                                                                                                                                                                                                           | 0.40 | 0.27         | 0.59         | <.001 |
| <b>Country</b>                              |                                                                                                                                                                                                                   |      |                     |       |                                                                                                                                                                                                                                               |      |              |              |       |
| England                                     | 1928                                                                                                                                                                                                              | 45.1 | 19.887 (2)          | <.001 | 4295                                                                                                                                                                                                                                          | ref  |              |              | .003  |
| Scotland                                    | 151                                                                                                                                                                                                               | 34.5 |                     |       | 383                                                                                                                                                                                                                                           | 0.70 | 0.56         | 0.88         | .002  |
| Wales                                       | 114                                                                                                                                                                                                               | 48.3 |                     |       | 208                                                                                                                                                                                                                                           | 1.18 | 0.89         | 1.58         | .253  |
| <b>Urban/rural</b>                          |                                                                                                                                                                                                                   |      |                     |       |                                                                                                                                                                                                                                               |      |              |              |       |
| Urban                                       | 1741                                                                                                                                                                                                              | 43.8 | 2.886 (1)           | .089  | 3721                                                                                                                                                                                                                                          |      |              |              |       |
| Rural                                       | 451                                                                                                                                                                                                               | 46.8 |                     |       | 1165                                                                                                                                                                                                                                          | 1.00 | 0.87         | 1.15         | .969  |
| <b>Ethnicity</b>                            |                                                                                                                                                                                                                   |      |                     |       |                                                                                                                                                                                                                                               |      |              |              |       |
| White British                               | 1832                                                                                                                                                                                                              | 45.9 | 35.180 (5)          | <.001 | 4224                                                                                                                                                                                                                                          | ref  |              |              | .074  |
| Any other white background                  | 104                                                                                                                                                                                                               | 31.2 |                     |       | 317                                                                                                                                                                                                                                           | 0.70 | 0.55         | 0.90         | .005  |
| Mixed or multiple ethnic groups             | 31                                                                                                                                                                                                                | 32.0 |                     |       | 62                                                                                                                                                                                                                                            | 0.73 | 0.43         | 1.26         | .258  |
| Asian or Asian British                      | 126                                                                                                                                                                                                               | 42.6 |                     |       | 158                                                                                                                                                                                                                                           | 1.14 | 0.82         | 1.59         | .430  |
| Black or Black British                      | 40                                                                                                                                                                                                                | 40.0 |                     |       | 66                                                                                                                                                                                                                                            | 1.07 | 0.64         | 1.77         | .803  |
| Other                                       | 31                                                                                                                                                                                                                | 39.2 |                     |       | 59                                                                                                                                                                                                                                            | 1.03 | 0.60         | 1.76         | .910  |
|                                             |                                                                                                                                                                                                                   |      |                     |       | Hosmer & Lemeshow $\chi^2= 9.412$ , df=8, p=0.309.<br>Final model $\chi^2=258.301$ , df=24, p<0.001<br>Nagelkerke = .069<br>Cases correctly classified: 60.3%.<br>92 cases excluded due to missing data on one or more independent variables. |      |              |              |       |

\* adjusted for all other variables in the model, AOR, adjusted odds ratio; ref, reference category; 95% CI, 95% confidence interval. # Fisher-Freeman-Halton Exact Test.

**Table S7 The Scottish/Welsh Government – Association between trust in sources of information about COVID-19 vaccine and socio-demographic variables – (a) bivariate results and (b) multivariate logistic regression.**

|                                             | (a) Bivariate associations between socio-demographics and trusting COVID-19 vaccine info from the Scottish/Welsh Government<br>% Trust completely or a great deal (weighted)<br>$\chi^2$ test for differences by demographics |      |               |       | (b) Logistic regression of trust in COVID-19 vaccine info from the Scottish/Welsh Government<br>1 = Trust completely or a great deal (289), 0 = Trust somewhat, very little or not at all (297)                                               |      |              |              |      |
|---------------------------------------------|-------------------------------------------------------------------------------------------------------------------------------------------------------------------------------------------------------------------------------|------|---------------|-------|-----------------------------------------------------------------------------------------------------------------------------------------------------------------------------------------------------------------------------------------------|------|--------------|--------------|------|
|                                             | n                                                                                                                                                                                                                             | %    | $\chi^2$ (df) | P     | N                                                                                                                                                                                                                                             | AOR* | 95% CI Lower | 95% CI Upper | P    |
| <b>Gender</b>                               |                                                                                                                                                                                                                               |      |               |       |                                                                                                                                                                                                                                               |      |              |              |      |
| Male                                        | 173                                                                                                                                                                                                                           | 49.0 | 3.935 (1)     | .047  | 274                                                                                                                                                                                                                                           | ref  |              |              |      |
| Female                                      | 132                                                                                                                                                                                                                           | 41.4 |               |       | 312                                                                                                                                                                                                                                           | 0.89 | 0.63         | 1.25         | .491 |
| <b>Age</b>                                  |                                                                                                                                                                                                                               |      |               |       |                                                                                                                                                                                                                                               |      |              |              |      |
| 18-29                                       | 61                                                                                                                                                                                                                            | 50.8 | 8.885 (6)     | .180  | 63                                                                                                                                                                                                                                            | ref  |              |              | .249 |
| 30-39 v 18-29                               | 45                                                                                                                                                                                                                            | 44.1 |               |       | 93                                                                                                                                                                                                                                            | 1.27 | 0.65         | 2.48         | .485 |
| 40-49 v 18-39                               | 36                                                                                                                                                                                                                            | 36.7 |               |       | 95                                                                                                                                                                                                                                            | 0.87 | 0.51         | 1.49         | .617 |
| 50-59 v 18-49                               | 75                                                                                                                                                                                                                            | 52.1 |               |       | 117                                                                                                                                                                                                                                           | 1.66 | 1.03         | 2.67         | .037 |
| 60-69 v 18-59                               | 46                                                                                                                                                                                                                            | 46.5 |               |       | 113                                                                                                                                                                                                                                           | 1.06 | 0.67         | 1.68         | .790 |
| 70-79 v 18-69                               | 32                                                                                                                                                                                                                            | 43.8 |               |       | 81                                                                                                                                                                                                                                            | 0.78 | 0.46         | 1.32         | .353 |
| 80+ v 18-79                                 | 10                                                                                                                                                                                                                            | 33.3 |               |       | 24                                                                                                                                                                                                                                            | 0.63 | 0.26         | 1.50         | .297 |
| <b>Education/Highest qualification</b>      |                                                                                                                                                                                                                               |      |               |       |                                                                                                                                                                                                                                               |      |              |              |      |
| No qualifications                           | 29                                                                                                                                                                                                                            | 27.9 | 31.212 (4)    | <.001 | 52                                                                                                                                                                                                                                            | ref  |              |              | .042 |
| Degree or equivalent and above              | 144                                                                                                                                                                                                                           | 56.7 |               |       | 280                                                                                                                                                                                                                                           | 2.18 | 1.12         | 4.23         | .021 |
| A levels / Vocational level 3 or equivalent | 79                                                                                                                                                                                                                            | 47.3 |               |       | 135                                                                                                                                                                                                                                           | 1.95 | 0.97         | 3.95         | .062 |
| Other qual'ns below A level / Voc level 3   | 34                                                                                                                                                                                                                            | 36.6 |               |       | 81                                                                                                                                                                                                                                            | 1.27 | 0.60         | 2.69         | .538 |
| Other qualification                         | 18                                                                                                                                                                                                                            | 35.3 |               |       | 38                                                                                                                                                                                                                                            | 1.03 | 0.42         | 2.53         | .941 |
| <b>Financial Status</b>                     |                                                                                                                                                                                                                               |      |               |       |                                                                                                                                                                                                                                               |      |              |              |      |
| Living comfortably                          | 84                                                                                                                                                                                                                            | 56.0 | 8.356 (4)     | .079  | 167                                                                                                                                                                                                                                           | ref  |              |              | .153 |
| Doing alright                               | 118                                                                                                                                                                                                                           | 42.4 |               |       | 256                                                                                                                                                                                                                                           | 0.69 | 0.46         | 1.05         | .081 |
| Just about getting by                       | 71                                                                                                                                                                                                                            | 43.3 |               |       | 114                                                                                                                                                                                                                                           | 0.62 | 0.37         | 1.05         | .074 |
| Finding it quite difficult                  | 22                                                                                                                                                                                                                            | 41.5 |               |       | 34                                                                                                                                                                                                                                            | 0.49 | 0.22         | 1.09         | .078 |
| Finding it very difficult                   | 11                                                                                                                                                                                                                            | 45.8 |               |       | 15                                                                                                                                                                                                                                            | 0.34 | 0.10         | 1.16         | .083 |
| <b>Country</b>                              |                                                                                                                                                                                                                               |      |               |       |                                                                                                                                                                                                                                               |      |              |              |      |
| Scotland                                    | 206                                                                                                                                                                                                                           | 46.9 | 1.208 (1)     | .272  | 381                                                                                                                                                                                                                                           | ref  |              |              |      |
| Wales                                       | 99                                                                                                                                                                                                                            | 42.5 |               |       | 205                                                                                                                                                                                                                                           | 1.09 | 0.76         | 1.57         | .642 |
| <b>Urban/rural</b>                          |                                                                                                                                                                                                                               |      |               |       |                                                                                                                                                                                                                                               |      |              |              |      |
| Urban                                       | 233                                                                                                                                                                                                                           | 46.9 | 1.719 (1)     | .190  | 409                                                                                                                                                                                                                                           |      |              |              |      |
| Rural                                       | 72                                                                                                                                                                                                                            | 41.1 |               |       | 177                                                                                                                                                                                                                                           | 0.62 | 0.42         | 0.91         | .015 |
| <b>Ethnicity</b>                            |                                                                                                                                                                                                                               |      |               |       |                                                                                                                                                                                                                                               |      |              |              |      |
| White British                               | 270                                                                                                                                                                                                                           | 45.3 | .147 (1)      | .702  | 535                                                                                                                                                                                                                                           | ref  |              |              |      |
| Other than white British                    | 32                                                                                                                                                                                                                            | 47.8 |               |       | 51                                                                                                                                                                                                                                            | 1.03 | 0.55         | 1.92         | .932 |
|                                             |                                                                                                                                                                                                                               |      |               |       | Hosmer & Lemeshow $\chi^2= 12.017$ , df=8, p=0.150.<br>Final model $\chi^2=35.151$ , df=18, p=0.009<br>Nagelkerke = .078<br>Cases correctly classified: 61.4%.<br>16 cases excluded due to missing data on one or more independent variables. |      |              |              |      |

\* adjusted for all other variables in the model, AOR, adjusted odds ratio; ref, reference category; 95% CI, 95% confidence interval. # Fisher-Freeman-Halton Exact Test.

**Table S8 Scientific and medical advisers – Association between trust in sources of information about COVID-19 vaccine and socio-demographic variables – (a) bivariate results and (b) multivariate logistic regression.**

|                                             | (a) Bivariate associations between socio-demographics and trusting COVID-19 vaccine info from scientific and medical advisers<br>% Trust completely or a great deal (weighted)<br>$\chi^2$ test for differences by demographics |      |               |       | (b) Logistic regression of trust in COVID-19 vaccine info from scientific and medical advisers<br>1 = Trust completely or a great deal (4008), 0 = Trust somewhat, very little or not at all (884)                                            |      |              |              |       |
|---------------------------------------------|---------------------------------------------------------------------------------------------------------------------------------------------------------------------------------------------------------------------------------|------|---------------|-------|-----------------------------------------------------------------------------------------------------------------------------------------------------------------------------------------------------------------------------------------------|------|--------------|--------------|-------|
|                                             | n                                                                                                                                                                                                                               | %    | $\chi^2$ (df) | P     | N                                                                                                                                                                                                                                             | AOR* | 95% CI Lower | 95% CI Upper | P     |
| <b>Gender</b>                               |                                                                                                                                                                                                                                 |      |               |       |                                                                                                                                                                                                                                               |      |              |              |       |
| Male                                        | 1885                                                                                                                                                                                                                            | 78.6 | 0.302 (2)     | .860  | 2097                                                                                                                                                                                                                                          | ref  |              |              | .544  |
| Female                                      | 2006                                                                                                                                                                                                                            | 78.2 |               |       | 2786                                                                                                                                                                                                                                          | 1.08 | 0.93         | 1.26         | .320  |
| Other                                       | 5                                                                                                                                                                                                                               | 71.4 |               |       | 9                                                                                                                                                                                                                                             | 0.71 | 0.14         | 3.51         | .674  |
| <b>Age</b>                                  |                                                                                                                                                                                                                                 |      |               |       |                                                                                                                                                                                                                                               |      |              |              |       |
| 18-29                                       | 644                                                                                                                                                                                                                             | 78.2 | 11.885 (6)    | .065  | 459                                                                                                                                                                                                                                           | ref  |              |              | .850  |
| 30-39 v 18-29                               | 643                                                                                                                                                                                                                             | 75.6 |               |       | 759                                                                                                                                                                                                                                           | 0.86 | 0.63         | 1.17         | .323  |
| 40-49 v 18-39                               | 631                                                                                                                                                                                                                             | 78.6 |               |       | 835                                                                                                                                                                                                                                           | 1.06 | 0.84         | 1.34         | .640  |
| 50-59 v 18-49                               | 677                                                                                                                                                                                                                             | 78.1 |               |       | 896                                                                                                                                                                                                                                           | 1.09 | 0.88         | 1.36         | .426  |
| 60-69 v 18-59                               | 572                                                                                                                                                                                                                             | 80.5 |               |       | 1004                                                                                                                                                                                                                                          | 1.03 | 0.84         | 1.26         | .785  |
| 70-79 v 18-69                               | 540                                                                                                                                                                                                                             | 82.2 |               |       | 763                                                                                                                                                                                                                                           | 1.05 | 0.84         | 1.32         | .654  |
| 80+ v 18-79                                 | 166                                                                                                                                                                                                                             | 76.1 |               |       | 176                                                                                                                                                                                                                                           | 1.10 | 0.72         | 1.68         | .650  |
| <b>Education/Highest qualification</b>      |                                                                                                                                                                                                                                 |      |               |       |                                                                                                                                                                                                                                               |      |              |              |       |
| No qualifications                           | 389                                                                                                                                                                                                                             | 63.1 | 147.739 (4)   | <.001 | 410                                                                                                                                                                                                                                           | ref  |              |              | <.001 |
| Degree or equivalent and above              | 1743                                                                                                                                                                                                                            | 84.1 |               |       | 2453                                                                                                                                                                                                                                          | 3.21 | 2.50         | 4.13         | <.001 |
| A levels / Vocational level 3 or equivalent | 905                                                                                                                                                                                                                             | 80.0 |               |       | 990                                                                                                                                                                                                                                           | 2.70 | 2.04         | 3.55         | <.001 |
| Other qual'ns below A level / Voc level 3   | 653                                                                                                                                                                                                                             | 77.8 |               |       | 784                                                                                                                                                                                                                                           | 1.98 | 1.51         | 2.61         | <.001 |
| Other qualification                         | 205                                                                                                                                                                                                                             | 67.7 |               |       | 255                                                                                                                                                                                                                                           | 1.23 | 0.87         | 1.73         | .245  |
| <b>Financial Status</b>                     |                                                                                                                                                                                                                                 |      |               |       |                                                                                                                                                                                                                                               |      |              |              |       |
| Living comfortably                          | 1110                                                                                                                                                                                                                            | 86.4 | 154.081 (4)   | <.001 | 1532                                                                                                                                                                                                                                          | ref  |              |              | <.001 |
| Doing alright                               | 1640                                                                                                                                                                                                                            | 80.6 |               |       | 1997                                                                                                                                                                                                                                          | 0.65 | 0.53         | 0.80         | <.001 |
| Just about getting by                       | 797                                                                                                                                                                                                                             | 70.4 |               |       | 960                                                                                                                                                                                                                                           | 0.46 | 0.36         | 0.58         | <.001 |
| Finding it quite difficult                  | 249                                                                                                                                                                                                                             | 73.9 |               |       | 266                                                                                                                                                                                                                                           | 0.51 | 0.36         | 0.72         | <.001 |
| Finding it very difficult                   | 97                                                                                                                                                                                                                              | 55.7 |               |       | 137                                                                                                                                                                                                                                           | 0.32 | 0.21         | 0.48         | <.001 |
| <b>Country</b>                              |                                                                                                                                                                                                                                 |      |               |       |                                                                                                                                                                                                                                               |      |              |              |       |
| England                                     | 3375                                                                                                                                                                                                                            | 78.8 | 3.260 (2)     | .196  | 4300                                                                                                                                                                                                                                          | ref  |              |              | .068  |
| Scotland                                    | 341                                                                                                                                                                                                                             | 77.0 |               |       | 384                                                                                                                                                                                                                                           | 1.03 | 0.77         | 1.37         | .843  |
| Wales                                       | 176                                                                                                                                                                                                                             | 74.3 |               |       | 208                                                                                                                                                                                                                                           | 0.67 | 0.47         | 0.94         | .022  |
| <b>Urban/rural</b>                          |                                                                                                                                                                                                                                 |      |               |       |                                                                                                                                                                                                                                               |      |              |              |       |
| Urban                                       | 3108                                                                                                                                                                                                                            | 77.7 | 5.368 (1)     | .021  | 3727                                                                                                                                                                                                                                          |      |              |              |       |
| Rural                                       | 783                                                                                                                                                                                                                             | 81.1 |               |       | 1165                                                                                                                                                                                                                                          | 1.00 | 0.83         | 1.20         | .978  |
| <b>Ethnicity</b>                            |                                                                                                                                                                                                                                 |      |               |       |                                                                                                                                                                                                                                               |      |              |              |       |
| White British                               | 3236                                                                                                                                                                                                                            | 80.9 | 87.036 (5)    | <.001 | 4225                                                                                                                                                                                                                                          | ref  |              |              | <.001 |
| Any other white background                  | 244                                                                                                                                                                                                                             | 72.8 |               |       | 318                                                                                                                                                                                                                                           | 0.56 | 0.42         | 0.75         | <.001 |
| Mixed or multiple ethnic groups             | 68                                                                                                                                                                                                                              | 70.8 |               |       | 62                                                                                                                                                                                                                                            | 0.51 | 0.28         | 0.92         | .025  |
| Asian or Asian British                      | 203                                                                                                                                                                                                                             | 66.6 |               |       | 160                                                                                                                                                                                                                                           | 0.46 | 0.32         | 0.67         | <.001 |
| Black or Black British                      | 57                                                                                                                                                                                                                              | 56.4 |               |       | 67                                                                                                                                                                                                                                            | 0.31 | 0.19         | 0.53         | <.001 |
| Other                                       | 53                                                                                                                                                                                                                              | 65.4 |               |       | 60                                                                                                                                                                                                                                            | 0.43 | 0.24         | 0.76         | .004  |
|                                             |                                                                                                                                                                                                                                 |      |               |       | Hosmer & Lemeshow $\chi^2= 5.496$ , df=8, p=0.704.<br>Final model $\chi^2=268.594$ , df=24, p<0.001<br>Nagelkerke = .087<br>Cases correctly classified: 82.1%.<br>86 cases excluded due to missing data on one or more independent variables. |      |              |              |       |

\* adjusted for all other variables in the model, AOR, adjusted odds ratio; ref, reference category; 95% CI, 95% confidence interval.

**Table S9 The World Health Organisation (WHO) – Association between trust in sources of information about COVID-19 vaccine and socio-demographic variables – (a) bivariate results and (b) multivariate logistic regression.**

|                                                                                                   | (a) Bivariate associations between socio-demographics and trusting COVID-19 vaccine info from The World Health Organisation (WHO) |      |                     |       | (b) Logistic regression of trust in COVID-19 vaccine info from The World Health Organisation (WHO)                                                                                                                                            |      |              |              |       |
|---------------------------------------------------------------------------------------------------|-----------------------------------------------------------------------------------------------------------------------------------|------|---------------------|-------|-----------------------------------------------------------------------------------------------------------------------------------------------------------------------------------------------------------------------------------------------|------|--------------|--------------|-------|
|                                                                                                   | n                                                                                                                                 | %    | $\chi^2$ (df)       | P     | N                                                                                                                                                                                                                                             | AOR* | 95% CI Lower | 95% CI Upper | P     |
| 1 = Trust completely or a great deal (3423), 0 = Trust somewhat, very little or not at all (1468) |                                                                                                                                   |      |                     |       |                                                                                                                                                                                                                                               |      |              |              |       |
| <b>Gender</b>                                                                                     |                                                                                                                                   |      |                     |       |                                                                                                                                                                                                                                               |      |              |              |       |
| Male                                                                                              | 1523                                                                                                                              | 63.7 | 23.303 <sup>#</sup> | <.001 | 2097                                                                                                                                                                                                                                          | ref  |              |              | <.001 |
| Female                                                                                            | 1797                                                                                                                              | 70.1 |                     |       | 2785                                                                                                                                                                                                                                          | 1.49 | 1.31         | 1.69         | <.001 |
| Other                                                                                             | 5                                                                                                                                 | 71.4 |                     |       | 9                                                                                                                                                                                                                                             | 1.92 | 0.39         | 9.42         | .420  |
| <b>Age</b>                                                                                        |                                                                                                                                   |      |                     |       |                                                                                                                                                                                                                                               |      |              |              |       |
| 18-29                                                                                             | 556                                                                                                                               | 68.1 | 5.005 (6)           | .543  | 458                                                                                                                                                                                                                                           | ref  |              |              | .177  |
| 30-39 v 18-29                                                                                     | 549                                                                                                                               | 64.5 |                     |       | 760                                                                                                                                                                                                                                           | 0.84 | 0.65         | 1.10         | .203  |
| 40-49 v 18-39                                                                                     | 538                                                                                                                               | 67.1 |                     |       | 835                                                                                                                                                                                                                                           | 0.98 | 0.81         | 1.20         | .882  |
| 50-59 v 18-49                                                                                     | 593                                                                                                                               | 68.4 |                     |       | 896                                                                                                                                                                                                                                           | 1.15 | 0.96         | 1.39         | .126  |
| 60-69 v 18-59                                                                                     | 484                                                                                                                               | 68.1 |                     |       | 1004                                                                                                                                                                                                                                          | 0.89 | 0.76         | 1.06         | .189  |
| 70-79 v 18-69                                                                                     | 450                                                                                                                               | 68.6 |                     |       | 762                                                                                                                                                                                                                                           | 0.87 | 0.73         | 1.04         | .127  |
| 80+ v 18-79                                                                                       | 140                                                                                                                               | 64.8 |                     |       | 176                                                                                                                                                                                                                                           | 0.86 | 0.62         | 1.20         | .366  |
| <b>Education/Highest qualification</b>                                                            |                                                                                                                                   |      |                     |       |                                                                                                                                                                                                                                               |      |              |              |       |
| No qualifications                                                                                 | 351                                                                                                                               | 56.9 | 75.592 (4)          | <.001 | 410                                                                                                                                                                                                                                           | ref  |              |              | <.001 |
| Degree or equivalent and above                                                                    | 1490                                                                                                                              | 72.3 |                     |       | 2452                                                                                                                                                                                                                                          | 1.73 | 1.38         | 2.18         | <.001 |
| A levels / Vocational level 3 or equivalent                                                       | 758                                                                                                                               | 67.0 |                     |       | 990                                                                                                                                                                                                                                           | 1.39 | 1.08         | 1.77         | .010  |
| Other qual'ns below A level / Voc level 3                                                         | 561                                                                                                                               | 66.9 |                     |       | 784                                                                                                                                                                                                                                           | 1.36 | 1.06         | 1.76         | .017  |
| Other qualification                                                                               | 166                                                                                                                               | 54.6 |                     |       | 255                                                                                                                                                                                                                                           | 0.88 | 0.64         | 1.21         | .428  |
| <b>Financial Status</b>                                                                           |                                                                                                                                   |      |                     |       |                                                                                                                                                                                                                                               |      |              |              |       |
| Living comfortably                                                                                | 953                                                                                                                               | 74.2 | 67.486 (4)          | <.001 | 1533                                                                                                                                                                                                                                          | ref  |              |              | <.001 |
| Doing alright                                                                                     | 1384                                                                                                                              | 68.2 |                     |       | 1995                                                                                                                                                                                                                                          | 0.78 | 0.66         | 0.91         | .002  |
| Just about getting by                                                                             | 691                                                                                                                               | 61.0 |                     |       | 960                                                                                                                                                                                                                                           | 0.60 | 0.50         | 0.73         | <.001 |
| Finding it quite difficult                                                                        | 204                                                                                                                               | 60.4 |                     |       | 266                                                                                                                                                                                                                                           | 0.56 | 0.42         | 0.75         | <.001 |
| Finding it very difficult                                                                         | 92                                                                                                                                | 54.8 |                     |       | 137                                                                                                                                                                                                                                           | 0.45 | 0.31         | 0.65         | <.001 |
| <b>Country</b>                                                                                    |                                                                                                                                   |      |                     |       |                                                                                                                                                                                                                                               |      |              |              |       |
| England                                                                                           | 2880                                                                                                                              | 67.4 | 2.028 (2)           | .363  | -                                                                                                                                                                                                                                             |      |              |              |       |
| Scotland                                                                                          | 283                                                                                                                               | 64.0 |                     |       | -                                                                                                                                                                                                                                             | -    | -            | -            | -     |
| Wales                                                                                             | 160                                                                                                                               | 67.5 |                     |       | -                                                                                                                                                                                                                                             | -    | -            | -            | -     |
| <b>Urban/rural</b>                                                                                |                                                                                                                                   |      |                     |       |                                                                                                                                                                                                                                               |      |              |              |       |
| Urban                                                                                             | 2663                                                                                                                              | 66.7 | 1.288 (1)           | .256  | 3727                                                                                                                                                                                                                                          |      |              |              |       |
| Rural                                                                                             | 660                                                                                                                               | 68.6 |                     |       | 1164                                                                                                                                                                                                                                          | 0.99 | 0.85         | 1.15         | .897  |
| <b>Ethnicity</b>                                                                                  |                                                                                                                                   |      |                     |       |                                                                                                                                                                                                                                               |      |              |              |       |
| White British                                                                                     | 2737                                                                                                                              | 68.5 | 30.713 (5)          | <.001 | 4224                                                                                                                                                                                                                                          | ref  |              |              | <.001 |
| Any other white background                                                                        | 223                                                                                                                               | 66.4 |                     |       | 318                                                                                                                                                                                                                                           | 0.75 | 0.58         | 0.96         | .023  |
| Mixed or multiple ethnic groups                                                                   | 59                                                                                                                                | 61.5 |                     |       | 62                                                                                                                                                                                                                                            | 0.63 | 0.37         | 1.07         | .089  |
| Asian or Asian British                                                                            | 171                                                                                                                               | 57.2 |                     |       | 160                                                                                                                                                                                                                                           | 0.64 | 0.46         | 0.90         | .010  |
| Black or Black British                                                                            | 55                                                                                                                                | 53.9 |                     |       | 67                                                                                                                                                                                                                                            | 0.44 | 0.27         | 0.72         | .001  |
| Other                                                                                             | 45                                                                                                                                | 56.3 |                     |       | 60                                                                                                                                                                                                                                            | 0.61 | 0.36         | 1.04         | .068  |
|                                                                                                   |                                                                                                                                   |      |                     |       | Hosmer & Lemeshow $\chi^2=14.933$ , df=8, p=0.060.<br>Final model $\chi^2=172.240$ , df=22, p<0.001<br>Nagelkerke = .049<br>Cases correctly classified: 70.0%.<br>87 cases excluded due to missing data on one or more independent variables. |      |              |              |       |

\* adjusted for all other variables in the model, AOR, adjusted odds ratio; ref, reference category; 95% CI, 95% confidence interval. # Fisher-Freeman-Halton Exact Test. Country was excluded from the logistic regression to achieve model fit.

**Table S10 The media (e.g. newspapers, magazines, television, radio) – Association between trust in sources of information about COVID-19 vaccine and socio-demographic variables – (a) bivariate results and (b) multivariate logistic regression.**

|                                             | (a) Bivariate associations between socio-demographics and trusting COVID-19 vaccine info from the media<br>% Trust completely or a great deal (weighted)<br>$\chi^2$ test for differences by demographics |      |               |       | (b) Logistic regression of trust in COVID-19 vaccine info from the media<br>1 = Trust completely or a great deal (361), 0 = Trust somewhat, very little or not at all (4530)                                                                |      |              |              |       |
|---------------------------------------------|-----------------------------------------------------------------------------------------------------------------------------------------------------------------------------------------------------------|------|---------------|-------|---------------------------------------------------------------------------------------------------------------------------------------------------------------------------------------------------------------------------------------------|------|--------------|--------------|-------|
|                                             | n                                                                                                                                                                                                         | %    | $\chi^2$ (df) | P     | N                                                                                                                                                                                                                                           | AOR* | 95% CI Lower | 95% CI Upper | P     |
| <b>Gender</b>                               |                                                                                                                                                                                                           |      |               |       |                                                                                                                                                                                                                                             |      |              |              |       |
| Male                                        | 176                                                                                                                                                                                                       | 7.3  | 2.193 (2)     | .334  | 2097                                                                                                                                                                                                                                        |      |              |              | .575  |
| Female                                      | 213                                                                                                                                                                                                       | 8.3  |               |       | 2785                                                                                                                                                                                                                                        | 1.13 | 0.90         | 1.41         | .293  |
| Other                                       | 0                                                                                                                                                                                                         | 0.0  |               |       | 9                                                                                                                                                                                                                                           | 0.00 | 0.00         |              | .999  |
| <b>Age</b>                                  |                                                                                                                                                                                                           |      |               |       |                                                                                                                                                                                                                                             |      |              |              |       |
| 18-29                                       | 57                                                                                                                                                                                                        | 6.9  | 39.450 (6)    | <.001 | 459                                                                                                                                                                                                                                         |      |              |              | .003  |
| 30-39 v 18-29                               | 57                                                                                                                                                                                                        | 6.7  |               |       | 759                                                                                                                                                                                                                                         | 0.84 | 0.52         | 1.35         | .462  |
| 40-49 v 18-39                               | 52                                                                                                                                                                                                        | 6.5  |               |       | 834                                                                                                                                                                                                                                         | 1.04 | 0.72         | 1.49         | .848  |
| 50-59 v 18-49                               | 58                                                                                                                                                                                                        | 6.7  |               |       | 895                                                                                                                                                                                                                                         | 1.08 | 0.78         | 1.50         | .629  |
| 60-69 v 18-59                               | 49                                                                                                                                                                                                        | 6.9  |               |       | 1004                                                                                                                                                                                                                                        | 1.05 | 0.77         | 1.42         | .761  |
| 70-79 v 18-69                               | 85                                                                                                                                                                                                        | 12.9 |               |       | 763                                                                                                                                                                                                                                         | 1.75 | 1.32         | 2.33         | <.001 |
| 80+ v 18-79                                 | 29                                                                                                                                                                                                        | 13.3 |               |       | 177                                                                                                                                                                                                                                         | 1.74 | 1.07         | 2.83         | .024  |
| <b>Education/Highest qualification</b>      |                                                                                                                                                                                                           |      |               |       |                                                                                                                                                                                                                                             |      |              |              |       |
| No qualifications                           | 77                                                                                                                                                                                                        | 12.5 | 34.152 (4)    | <.001 | 409                                                                                                                                                                                                                                         |      |              |              | .005  |
| Degree or equivalent and above              | 153                                                                                                                                                                                                       | 7.4  |               |       | 2454                                                                                                                                                                                                                                        | 0.63 | 0.44         | 0.90         | .011  |
| A levels / Vocational level 3 or equivalent | 58                                                                                                                                                                                                        | 5.1  |               |       | 990                                                                                                                                                                                                                                         | 0.44 | 0.29         | 0.68         | <.001 |
| Other qual'ns below A level / Voc level 3   | 79                                                                                                                                                                                                        | 9.4  |               |       | 784                                                                                                                                                                                                                                         | 0.72 | 0.48         | 1.07         | .102  |
| Other qualification                         | 21                                                                                                                                                                                                        | 7.0  |               |       | 254                                                                                                                                                                                                                                         | 0.56 | 0.31         | 1.00         | .051  |
| <b>Financial Status</b>                     |                                                                                                                                                                                                           |      |               |       |                                                                                                                                                                                                                                             |      |              |              |       |
| Living comfortably                          | 105                                                                                                                                                                                                       | 8.2  | 34.041 (4)    | <.001 | 1533                                                                                                                                                                                                                                        |      |              |              | .671  |
| Doing alright                               | 122                                                                                                                                                                                                       | 6.0  |               |       | 1996                                                                                                                                                                                                                                        | 0.90 | 0.69         | 1.16         | .413  |
| Just about getting by                       | 99                                                                                                                                                                                                        | 8.8  |               |       | 959                                                                                                                                                                                                                                         | 1.01 | 0.73         | 1.39         | .974  |
| Finding it quite difficult                  | 33                                                                                                                                                                                                        | 9.8  |               |       | 266                                                                                                                                                                                                                                         | 1.22 | 0.75         | 1.98         | .430  |
| Finding it very difficult                   | 30                                                                                                                                                                                                        | 17.2 |               |       | 137                                                                                                                                                                                                                                         | 0.79 | 0.37         | 1.68         | .535  |
| <b>Country</b>                              |                                                                                                                                                                                                           |      |               |       |                                                                                                                                                                                                                                             |      |              |              |       |
| England                                     | 336                                                                                                                                                                                                       | 7.8  | .515 (2)      | .773  | 4300                                                                                                                                                                                                                                        |      |              |              | .457  |
| Scotland                                    | 32                                                                                                                                                                                                        | 7.3  |               |       | 383                                                                                                                                                                                                                                         | 0.79 | 0.51         | 1.24         | .313  |
| Wales                                       | 21                                                                                                                                                                                                        | 8.8  |               |       | 208                                                                                                                                                                                                                                         | 1.19 | 0.71         | 2.00         | .499  |
| <b>Urban/rural</b>                          |                                                                                                                                                                                                           |      |               |       |                                                                                                                                                                                                                                             |      |              |              |       |
| Urban                                       | 323                                                                                                                                                                                                       | 8.1  | 1.957 (1)     | .162  | 3726                                                                                                                                                                                                                                        |      |              |              |       |
| Rural                                       | 65                                                                                                                                                                                                        | 6.7  |               |       | 1165                                                                                                                                                                                                                                        | 0.91 | 0.70         | 1.19         | .486  |
| <b>Ethnicity</b>                            |                                                                                                                                                                                                           |      |               |       |                                                                                                                                                                                                                                             |      |              |              |       |
| White British                               | 296                                                                                                                                                                                                       | 7.4  | 6.645 (5)     | .248  | 4226                                                                                                                                                                                                                                        |      |              |              | .073  |
| Any other white background                  | 30                                                                                                                                                                                                        | 9.0  |               |       | 318                                                                                                                                                                                                                                         | 1.55 | 1.03         | 2.32         | .035  |
| Mixed or multiple ethnic groups             | 6                                                                                                                                                                                                         | 6.2  |               |       | 62                                                                                                                                                                                                                                          | 1.31 | 0.52         | 3.33         | .570  |
| Asian or Asian British                      | 30                                                                                                                                                                                                        | 9.9  |               |       | 160                                                                                                                                                                                                                                         | 1.73 | 1.02         | 2.94         | .043  |
| Black or Black British                      | 12                                                                                                                                                                                                        | 11.9 |               |       | 66                                                                                                                                                                                                                                          | 1.84 | 0.82         | 4.12         | .139  |
| Other                                       | 8                                                                                                                                                                                                         | 10.3 |               |       | 59                                                                                                                                                                                                                                          | 1.62 | 0.68         | 3.85         | .274  |
|                                             |                                                                                                                                                                                                           |      |               |       | Hosmer & Lemeshow $\chi^2=2.359$ , df=8, p=0.968.<br>Final model $\chi^2=54.051$ , df=24, p<0.001<br>Nagelkerke = .027<br>Cases correctly classified: 92.6%.<br>87 cases excluded due to missing data on one or more independent variables. |      |              |              |       |

\* adjusted for all other variables in the model, AOR, adjusted odds ratio; ref, reference category; 95% CI, 95% confidence interval.



**Table S11 Social media – Association between trust in sources of information about COVID-19 vaccine and socio-demographic variables – (a) bivariate results and (b) multivariate logistic regression.**

|                                             | (a) Bivariate associations between socio-demographics and trusting COVID-19 vaccine info from social media<br>% Trust completely or a great deal (weighted)<br>$\chi^2$ test for differences by demographics |     |                     |       | (b) Logistic regression of trust in COVID-19 vaccine info from social media<br>1 = Trust completely or a great deal (95), 0 = Trust somewhat, very little or not at all (4792)                                                               |      |              |              |       |
|---------------------------------------------|--------------------------------------------------------------------------------------------------------------------------------------------------------------------------------------------------------------|-----|---------------------|-------|----------------------------------------------------------------------------------------------------------------------------------------------------------------------------------------------------------------------------------------------|------|--------------|--------------|-------|
|                                             | n                                                                                                                                                                                                            | %   | $\chi^2$ (df)       | P     | N                                                                                                                                                                                                                                            | AOR* | 95% CI Lower | 95% CI Upper | P     |
| <b>Gender</b>                               |                                                                                                                                                                                                              |     |                     |       |                                                                                                                                                                                                                                              |      |              |              |       |
| Male                                        | 63                                                                                                                                                                                                           | 2.6 | 0.284 (2)           | .868  | 2094                                                                                                                                                                                                                                         | ref  |              |              | .845  |
| Female                                      | 71                                                                                                                                                                                                           | 2.8 |                     |       | 2784                                                                                                                                                                                                                                         | 1.13 | 0.74         | 1.73         | .561  |
| Other                                       | 0                                                                                                                                                                                                            | 0.0 |                     |       | 9                                                                                                                                                                                                                                            | 0.00 | 0.00         |              | .999  |
| <b>Age</b>                                  |                                                                                                                                                                                                              |     |                     |       |                                                                                                                                                                                                                                              |      |              |              |       |
| 18-29                                       | 31                                                                                                                                                                                                           | 3.8 | 12.626 (6)          | .049  | 459                                                                                                                                                                                                                                          | ref  |              |              | .634  |
| 30-39 v 18-29                               | 25                                                                                                                                                                                                           | 2.9 |                     |       | 759                                                                                                                                                                                                                                          | 0.55 | 0.24         | 1.22         | .139  |
| 40-49 v 18-39                               | 22                                                                                                                                                                                                           | 2.7 |                     |       | 835                                                                                                                                                                                                                                          | 0.89 | 0.47         | 1.67         | .713  |
| 50-59 v 18-49                               | 13                                                                                                                                                                                                           | 1.5 |                     |       | 896                                                                                                                                                                                                                                          | 0.85 | 0.47         | 1.55         | .596  |
| 60-69 v 18-59                               | 13                                                                                                                                                                                                           | 1.8 |                     |       | 1003                                                                                                                                                                                                                                         | 0.71 | 0.39         | 1.29         | .259  |
| 70-79 v 18-69                               | 19                                                                                                                                                                                                           | 2.9 |                     |       | 761                                                                                                                                                                                                                                          | 1.11 | 0.62         | 1.97         | .727  |
| 80+ v 18-79                                 | 9                                                                                                                                                                                                            | 4.2 |                     |       | 174                                                                                                                                                                                                                                          | 1.26 | 0.49         | 3.25         | .631  |
| <b>Education/Highest qualification</b>      |                                                                                                                                                                                                              |     |                     |       |                                                                                                                                                                                                                                              |      |              |              |       |
| No qualifications                           | 31                                                                                                                                                                                                           | 5.1 | 24.978 (4)          | <.001 | 409                                                                                                                                                                                                                                          | ref  |              |              | <.001 |
| Degree or equivalent and above              | 44                                                                                                                                                                                                           | 2.1 |                     |       | 2452                                                                                                                                                                                                                                         | 0.24 | 0.13         | 0.44         | <.001 |
| A levels / Vocational level 3 or equivalent | 18                                                                                                                                                                                                           | 1.6 |                     |       | 989                                                                                                                                                                                                                                          | 0.32 | 0.16         | 0.64         | .001  |
| Other qual'ns below A level / Voc level 3   | 32                                                                                                                                                                                                           | 3.8 |                     |       | 782                                                                                                                                                                                                                                          | 0.50 | 0.26         | 0.94         | .031  |
| Other qualification                         | 8                                                                                                                                                                                                            | 2.6 |                     |       | 255                                                                                                                                                                                                                                          | 0.46 | 0.18         | 1.18         | .106  |
| <b>Financial Status</b>                     |                                                                                                                                                                                                              |     |                     |       |                                                                                                                                                                                                                                              |      |              |              |       |
| Living comfortably                          | 34                                                                                                                                                                                                           | 2.6 | 26.413 (4)          | <.001 | 1531                                                                                                                                                                                                                                         | ref  |              |              | .522  |
| Doing alright                               | 38                                                                                                                                                                                                           | 1.9 |                     |       | 1994                                                                                                                                                                                                                                         | 0.73 | 0.43         | 1.24         | .241  |
| Just about getting by                       | 35                                                                                                                                                                                                           | 3.1 |                     |       | 959                                                                                                                                                                                                                                          | 0.99 | 0.55         | 1.79         | .976  |
| Finding it quite difficult                  | 12                                                                                                                                                                                                           | 3.6 |                     |       | 266                                                                                                                                                                                                                                          | 1.35 | 0.60         | 3.04         | .473  |
| Finding it very difficult                   | 14                                                                                                                                                                                                           | 8.1 |                     |       | 137                                                                                                                                                                                                                                          | 0.81 | 0.23         | 2.84         | .746  |
| <b>Country</b>                              |                                                                                                                                                                                                              |     |                     |       |                                                                                                                                                                                                                                              |      |              |              |       |
| England                                     | 118                                                                                                                                                                                                          | 2.8 | .404(2)             | .817  | 4295                                                                                                                                                                                                                                         | ref  |              |              | .215  |
| Scotland                                    | 10                                                                                                                                                                                                           | 2.3 |                     |       | 384                                                                                                                                                                                                                                          | 0.40 | 0.12         | 1.27         | .120  |
| Wales                                       | 6                                                                                                                                                                                                            | 2.5 |                     |       | 208                                                                                                                                                                                                                                          | 1.42 | 0.56         | 3.58         | .463  |
| <b>Urban/rural</b>                          |                                                                                                                                                                                                              |     |                     |       |                                                                                                                                                                                                                                              |      |              |              |       |
| Urban                                       | 122                                                                                                                                                                                                          | 3.1 | 9.660(1)            | .002  | 3724                                                                                                                                                                                                                                         |      |              |              |       |
| Rural                                       | 12                                                                                                                                                                                                           | 1.2 |                     |       | 1163                                                                                                                                                                                                                                         | 0.57 | 0.31         | 1.05         | .071  |
| <b>Ethnicity</b>                            |                                                                                                                                                                                                              |     |                     |       |                                                                                                                                                                                                                                              |      |              |              |       |
| White British                               | 94                                                                                                                                                                                                           | 2.4 | 17.781 <sup>#</sup> | .002  | 4220                                                                                                                                                                                                                                         | ref  |              |              | .326  |
| Any other white background                  | 7                                                                                                                                                                                                            | 2.1 |                     |       | 318                                                                                                                                                                                                                                          | 1.00 | 0.39         | 2.53         | .994  |
| Mixed or multiple ethnic groups             | 4                                                                                                                                                                                                            | 4.1 |                     |       | 62                                                                                                                                                                                                                                           | 2.52 | 0.75         | 8.45         | .134  |
| Asian or Asian British                      | 14                                                                                                                                                                                                           | 4.6 |                     |       | 160                                                                                                                                                                                                                                          | 1.85 | 0.77         | 4.45         | .172  |
| Black or Black British                      | 9                                                                                                                                                                                                            | 8.8 |                     |       | 69                                                                                                                                                                                                                                           | 2.57 | 0.76         | 8.64         | .128  |
| Other                                       | 1                                                                                                                                                                                                            | 1.2 |                     |       | 60                                                                                                                                                                                                                                           | 0.83 | 0.11         | 6.20         | .855  |
|                                             |                                                                                                                                                                                                              |     |                     |       | Hosmer & Lemeshow $\chi^2= 5.858$ , df=8, p=0.663.<br>Final model $\chi^2=46.839$ , df=24, p=0.004<br>Nagelkerke = .055<br>Cases correctly classified: 98.1%.<br>91 cases excluded due to missing data on one or more independent variables. |      |              |              |       |

\* adjusted for all other variables in the model, AOR, adjusted odds ratio; ref, reference category; 95% CI, 95% confidence interval. <sup>#</sup> Fisher-Freeman-Halton Exact Test.

**Table S12 Celebrities and social media influencers – Association between trust in sources of information about COVID-19 vaccine and socio-demographic variables – (a) bivariate results and (b) multivariate logistic regression.**

|                                             | (a) Bivariate associations between socio-demographics and trusting COVID-19 vaccine info from celebrities and social media influencers<br>% Trust completely or a great deal (weighted)<br>$\chi^2$ test for differences by demographics |     |                     |       | (b) Logistic regression of trust in COVID-19 vaccine info from celebrities and social media influencers<br>1 = Trust completely or a great deal (95), 0 = Trust somewhat, very little or not at all (4795)                                  |      |              |              |       |
|---------------------------------------------|------------------------------------------------------------------------------------------------------------------------------------------------------------------------------------------------------------------------------------------|-----|---------------------|-------|---------------------------------------------------------------------------------------------------------------------------------------------------------------------------------------------------------------------------------------------|------|--------------|--------------|-------|
|                                             | n                                                                                                                                                                                                                                        | %   | $\chi^2$ (df)       | P     | N                                                                                                                                                                                                                                           | AOR* | 95% CI Lower | 95% CI Upper | P     |
| <b>Gender</b>                               |                                                                                                                                                                                                                                          |     |                     |       |                                                                                                                                                                                                                                             |      |              |              |       |
| Male                                        | 57                                                                                                                                                                                                                                       | 2.4 | 1.430 (2)           | .489  | 2097                                                                                                                                                                                                                                        | ref  |              |              | .996  |
| Female                                      | 74                                                                                                                                                                                                                                       | 2.9 |                     |       | 2784                                                                                                                                                                                                                                        | 0.98 | 0.65         | 1.49         | .928  |
| Other                                       | 0                                                                                                                                                                                                                                        | 0.0 |                     |       | 9                                                                                                                                                                                                                                           | 0.00 | 0.00         |              | .999  |
| <b>Age</b>                                  |                                                                                                                                                                                                                                          |     |                     |       |                                                                                                                                                                                                                                             |      |              |              |       |
| 18-29                                       | 24                                                                                                                                                                                                                                       | 2.9 | 19.156 (6)          | .004  | 459                                                                                                                                                                                                                                         | ref  |              |              | .348  |
| 30-39 v 18-29                               | 25                                                                                                                                                                                                                                       | 3.0 |                     |       | 758                                                                                                                                                                                                                                         | 0.90 | 0.37         | 2.21         | .818  |
| 40-49 v 18-39                               | 23                                                                                                                                                                                                                                       | 2.9 |                     |       | 835                                                                                                                                                                                                                                         | 1.11 | 0.58         | 2.14         | .744  |
| 50-59 v 18-49                               | 18                                                                                                                                                                                                                                       | 2.1 |                     |       | 895                                                                                                                                                                                                                                         | 1.28 | 0.73         | 2.25         | .390  |
| 60-69 v 18-59                               | 9                                                                                                                                                                                                                                        | 1.3 |                     |       | 1004                                                                                                                                                                                                                                        | 0.65 | 0.34         | 1.25         | .192  |
| 70-79 v 18-69                               | 17                                                                                                                                                                                                                                       | 2.6 |                     |       | 762                                                                                                                                                                                                                                         | 1.26 | 0.70         | 2.28         | .441  |
| 80+ v 18-79                                 | 14                                                                                                                                                                                                                                       | 6.4 |                     |       | 177                                                                                                                                                                                                                                         | 2.18 | 0.96         | 4.98         | .064  |
| <b>Education/Highest qualification</b>      |                                                                                                                                                                                                                                          |     |                     |       |                                                                                                                                                                                                                                             |      |              |              |       |
| No qualifications                           | 35                                                                                                                                                                                                                                       | 5.7 | 58.886 (4)          | <.001 | 409                                                                                                                                                                                                                                         | ref  |              |              | .002  |
| Degree or equivalent and above              | 32                                                                                                                                                                                                                                       | 1.5 |                     |       | 2453                                                                                                                                                                                                                                        | 0.31 | 0.17         | 0.58         | <.001 |
| A levels / Vocational level 3 or equivalent | 13                                                                                                                                                                                                                                       | 1.1 |                     |       | 990                                                                                                                                                                                                                                         | 0.31 | 0.15         | 0.65         | .002  |
| Other qual'ns below A level / Voc level 3   | 41                                                                                                                                                                                                                                       | 4.9 |                     |       | 783                                                                                                                                                                                                                                         | 0.59 | 0.31         | 1.11         | .103  |
| Other qualification                         | 10                                                                                                                                                                                                                                       | 3.3 |                     |       | 255                                                                                                                                                                                                                                         | 0.57 | 0.24         | 1.40         | .221  |
| <b>Financial Status</b>                     |                                                                                                                                                                                                                                          |     |                     |       |                                                                                                                                                                                                                                             |      |              |              |       |
| Living comfortably                          | 23                                                                                                                                                                                                                                       | 1.8 | 53.820 (4)          | <.001 | 1533                                                                                                                                                                                                                                        | ref  |              |              | .022  |
| Doing alright                               | 27                                                                                                                                                                                                                                       | 1.3 |                     |       | 1995                                                                                                                                                                                                                                        | 1.01 | 0.56         | 1.82         | .975  |
| Just about getting by                       | 59                                                                                                                                                                                                                                       | 5.2 |                     |       | 959                                                                                                                                                                                                                                         | 2.08 | 1.13         | 3.80         | .018  |
| Finding it quite difficult                  | 11                                                                                                                                                                                                                                       | 3.3 |                     |       | 266                                                                                                                                                                                                                                         | 2.47 | 1.08         | 5.64         | .032  |
| Finding it very difficult                   | 10                                                                                                                                                                                                                                       | 5.7 |                     |       | 137                                                                                                                                                                                                                                         | 1.86 | 0.60         | 5.77         | .284  |
| <b>Country</b>                              |                                                                                                                                                                                                                                          |     |                     |       |                                                                                                                                                                                                                                             |      |              |              |       |
| England                                     | 117                                                                                                                                                                                                                                      | 2.7 | 11.948 (2)          | .003  | 4299                                                                                                                                                                                                                                        | ref  |              |              | .028  |
| Scotland                                    | 3                                                                                                                                                                                                                                        | 0.7 |                     |       | 383                                                                                                                                                                                                                                         | 0.40 | 0.13         | 1.29         | .127  |
| Wales                                       | 12                                                                                                                                                                                                                                       | 5.0 |                     |       | 208                                                                                                                                                                                                                                         | 2.26 | 1.06         | 4.82         | .036  |
| <b>Urban/rural</b>                          |                                                                                                                                                                                                                                          |     |                     |       |                                                                                                                                                                                                                                             |      |              |              |       |
| Urban                                       | 119                                                                                                                                                                                                                                      | 3.0 | 9.096 (1)           | .003  | 3725                                                                                                                                                                                                                                        |      |              |              |       |
| Rural                                       | 12                                                                                                                                                                                                                                       | 1.2 |                     |       | 1165                                                                                                                                                                                                                                        | 0.64 | 0.36         | 1.14         | .133  |
| <b>Ethnicity</b>                            |                                                                                                                                                                                                                                          |     |                     |       |                                                                                                                                                                                                                                             |      |              |              |       |
| White British                               | 94                                                                                                                                                                                                                                       | 2.4 | 14.208 <sup>a</sup> | .008  | 4224                                                                                                                                                                                                                                        | ref  |              |              | .574  |
| Any other white background                  | 11                                                                                                                                                                                                                                       | 3.3 |                     |       | 318                                                                                                                                                                                                                                         | 1.62 | 0.75         | 3.47         | .217  |
| Mixed or multiple ethnic groups             | 1                                                                                                                                                                                                                                        | 1.0 |                     |       | 62                                                                                                                                                                                                                                          | 0.84 | 0.11         | 6.27         | .866  |
| Asian or Asian British                      | 10                                                                                                                                                                                                                                       | 3.3 |                     |       | 160                                                                                                                                                                                                                                         | 1.58 | 0.61         | 4.09         | .346  |
| Black or Black British                      | 9                                                                                                                                                                                                                                        | 8.9 |                     |       | 66                                                                                                                                                                                                                                          | 2.36 | 0.70         | 7.94         | .166  |
| Other                                       | 1                                                                                                                                                                                                                                        | 1.2 |                     |       | 60                                                                                                                                                                                                                                          | 0.94 | 0.13         | 7.04         | .956  |
|                                             |                                                                                                                                                                                                                                          |     |                     |       | Hosmer & Lemeshow $\chi^2=9.111$ , df=8, p=0.333.<br>Final model $\chi^2=57.132$ , df=24, p<0.001<br>Nagelkerke = .067<br>Cases correctly classified: 98.1%.<br>88 cases excluded due to missing data on one or more independent variables. |      |              |              |       |

\* adjusted for all other variables in the model, AOR, adjusted odds ratio; ref, reference category; 95% CI, 95% confidence interval.

**Table S13 Family and friends – Association between trust in sources of information about COVID-19 vaccine and socio-demographic variables – (a) bivariate results and (b) multivariate logistic regression.**

|                                             | (a) Bivariate associations between socio-demographics and trusting COVID-19 vaccine info from family and friends<br>% Trust completely or a great deal (weighted)<br>$\chi^2$ test for differences by demographics |      |               |       | (b) Logistic regression of trust in COVID-19 vaccine info from family and friends<br>1 = Trust completely or a great deal (1139), 0 = Trust somewhat, very little or not at all (3752)                                                        |      |              |              |       |
|---------------------------------------------|--------------------------------------------------------------------------------------------------------------------------------------------------------------------------------------------------------------------|------|---------------|-------|-----------------------------------------------------------------------------------------------------------------------------------------------------------------------------------------------------------------------------------------------|------|--------------|--------------|-------|
|                                             | n                                                                                                                                                                                                                  | %    | $\chi^2$ (df) | P     | N                                                                                                                                                                                                                                             | AOR* | 95% CI Lower | 95% CI Upper | P     |
| <b>Gender</b>                               |                                                                                                                                                                                                                    |      |               |       |                                                                                                                                                                                                                                               |      |              |              |       |
| Male                                        | 557                                                                                                                                                                                                                | 23.2 | 4.455 (2)     | .108  | 2098                                                                                                                                                                                                                                          | ref  |              |              | .053  |
| Female                                      | 660                                                                                                                                                                                                                | 25.8 |               |       | 2784                                                                                                                                                                                                                                          | 1.17 | 1.01         | 1.34         | .030  |
| Other                                       | 2                                                                                                                                                                                                                  | 28.6 |               |       | 9                                                                                                                                                                                                                                             | 2.39 | 0.58         | 9.85         | .227  |
| <b>Age</b>                                  |                                                                                                                                                                                                                    |      |               |       |                                                                                                                                                                                                                                               |      |              |              |       |
| 18-29                                       | 140                                                                                                                                                                                                                | 17.0 | 109.226 (6)   | <.001 | 459                                                                                                                                                                                                                                           | ref  |              |              | <.001 |
| 30-39 v 18-29                               | 194                                                                                                                                                                                                                | 22.8 |               |       | 759                                                                                                                                                                                                                                           | 1.28 | 0.94         | 1.73         | .112  |
| 40-49 v 18-39                               | 186                                                                                                                                                                                                                | 23.3 |               |       | 834                                                                                                                                                                                                                                           | 1.18 | 0.94         | 1.47         | .157  |
| 50-59 v 18-49                               | 182                                                                                                                                                                                                                | 21.0 |               |       | 896                                                                                                                                                                                                                                           | 0.93 | 0.76         | 1.15         | .504  |
| 60-69 v 18-59                               | 176                                                                                                                                                                                                                | 24.8 |               |       | 1004                                                                                                                                                                                                                                          | 1.11 | 0.92         | 1.33         | .283  |
| 70-79 v 18-69                               | 233                                                                                                                                                                                                                | 35.6 |               |       | 762                                                                                                                                                                                                                                           | 1.85 | 1.54         | 2.23         | <.001 |
| 80+ v 18-79                                 | 90                                                                                                                                                                                                                 | 41.1 |               |       | 177                                                                                                                                                                                                                                           | 2.33 | 1.69         | 3.20         | <.001 |
| <b>Education/Highest qualification</b>      |                                                                                                                                                                                                                    |      |               |       |                                                                                                                                                                                                                                               |      |              |              | <.001 |
| No qualifications                           | 203                                                                                                                                                                                                                | 33.0 | 70.692 (4)    | <.001 | 410                                                                                                                                                                                                                                           | ref  |              |              | <.001 |
| Degree or equivalent and above              | 403                                                                                                                                                                                                                | 19.4 |               |       | 2454                                                                                                                                                                                                                                          | 0.61 | 0.47         | 0.77         | <.001 |
| A levels / Vocational level 3 or equivalent | 271                                                                                                                                                                                                                | 23.9 |               |       | 990                                                                                                                                                                                                                                           | 0.81 | 0.62         | 1.05         | .112  |
| Other qual'ns below A level / Voc level 3   | 254                                                                                                                                                                                                                | 30.4 |               |       | 783                                                                                                                                                                                                                                           | 0.99 | 0.76         | 1.29         | .925  |
| Other qualification                         | 86                                                                                                                                                                                                                 | 28.5 |               |       | 254                                                                                                                                                                                                                                           | 0.96 | 0.68         | 1.36         | .812  |
| <b>Financial Status</b>                     |                                                                                                                                                                                                                    |      |               |       |                                                                                                                                                                                                                                               |      |              |              |       |
| Living comfortably                          | 330                                                                                                                                                                                                                | 25.7 | 6.383 (4)     | .172  | 1533                                                                                                                                                                                                                                          | ref  |              |              | .667  |
| Doing alright                               | 470                                                                                                                                                                                                                | 23.1 |               |       | 1997                                                                                                                                                                                                                                          | 0.94 | 0.79         | 1.10         | .424  |
| Just about getting by                       | 300                                                                                                                                                                                                                | 26.6 |               |       | 958                                                                                                                                                                                                                                           | 1.00 | 0.81         | 1.22         | .976  |
| Finding it quite difficult                  | 81                                                                                                                                                                                                                 | 24.0 |               |       | 266                                                                                                                                                                                                                                           | 1.03 | 0.75         | 1.42         | .856  |
| Finding it very difficult                   | 38                                                                                                                                                                                                                 | 21.8 |               |       | 137                                                                                                                                                                                                                                           | 0.75 | 0.47         | 1.18         | .212  |
| <b>Country</b>                              |                                                                                                                                                                                                                    |      |               |       |                                                                                                                                                                                                                                               |      |              |              |       |
| England                                     | 1051                                                                                                                                                                                                               | 24.6 | 13.592 (2)    | .001  | 4299                                                                                                                                                                                                                                          | ref  |              |              | .012  |
| Scotland                                    | 89                                                                                                                                                                                                                 | 20.1 |               |       | 384                                                                                                                                                                                                                                           | 1.00 | 0.77         | 1.29         | .976  |
| Wales                                       | 78                                                                                                                                                                                                                 | 32.9 |               |       | 208                                                                                                                                                                                                                                           | 1.59 | 1.17         | 2.17         | .003  |
| <b>Urban/rural</b>                          |                                                                                                                                                                                                                    |      |               |       |                                                                                                                                                                                                                                               |      |              |              |       |
| Urban                                       | 979                                                                                                                                                                                                                | 24.5 | .029 (1)      | .866  | 3726                                                                                                                                                                                                                                          |      |              |              |       |
| Rural                                       | 239                                                                                                                                                                                                                | 24.8 |               |       | 1165                                                                                                                                                                                                                                          | 0.91 | 0.77         | 1.07         | .237  |
| <b>Ethnicity</b>                            |                                                                                                                                                                                                                    |      |               |       |                                                                                                                                                                                                                                               |      |              |              |       |
| White British                               | 1005                                                                                                                                                                                                               | 25.1 | 36.523 (5)    | <.001 | 4226                                                                                                                                                                                                                                          | ref  |              |              | .029  |
| Any other white background                  | 50                                                                                                                                                                                                                 | 15.0 |               |       | 317                                                                                                                                                                                                                                           | 0.79 | 0.58         | 1.07         | .128  |
| Mixed or multiple ethnic groups             | 15                                                                                                                                                                                                                 | 15.5 |               |       | 62                                                                                                                                                                                                                                            | 0.76 | 0.38         | 1.51         | .428  |
| Asian or Asian British                      | 100                                                                                                                                                                                                                | 32.8 |               |       | 160                                                                                                                                                                                                                                           | 1.52 | 1.06         | 2.18         | .024  |
| Black or Black British                      | 27                                                                                                                                                                                                                 | 26.7 |               |       | 67                                                                                                                                                                                                                                            | 1.39 | 0.79         | 2.46         | .250  |
| Other                                       | 12                                                                                                                                                                                                                 | 15.2 |               |       | 59                                                                                                                                                                                                                                            | 0.53 | 0.24         | 1.18         | .122  |
|                                             |                                                                                                                                                                                                                    |      |               |       | Hosmer & Lemeshow $\chi^2= 6.067$ , df=8, p=0.640.<br>Final model $\chi^2=153.732$ , df=24, p<0.001<br>Nagelkerke = .047<br>Cases correctly classified: 76.7%.<br>87 cases excluded due to missing data on one or more independent variables. |      |              |              |       |

\* adjusted for all other variables in the model, AOR, adjusted odds ratio; ref, reference category; 95% CI, 95% confidence interval.

**Table S14 Faith or community leaders – Association between trust in sources of information about COVID-19 vaccine and socio-demographic variables – (a) bivariate results and (b) multivariate logistic regression.**

|                                             | (a) Bivariate associations between socio-demographics and trusting COVID-19 vaccine info from faith and community leaders<br>% Trust completely or a great deal (weighted)<br>$\chi^2$ test for differences by demographics |      |               |       | (b) Logistic regression of trust in COVID-19 vaccine info from faith and community leaders<br>1 = Trust completely or a great deal (161), 0 = Trust somewhat, very little or not at all (4724)                                                |       |              |              |       |
|---------------------------------------------|-----------------------------------------------------------------------------------------------------------------------------------------------------------------------------------------------------------------------------|------|---------------|-------|-----------------------------------------------------------------------------------------------------------------------------------------------------------------------------------------------------------------------------------------------|-------|--------------|--------------|-------|
|                                             | n                                                                                                                                                                                                                           | %    | $\chi^2$ (df) | P     | N                                                                                                                                                                                                                                             | AOR*  | 95% CI Lower | 95% CI Upper | P     |
| <b>Gender</b>                               |                                                                                                                                                                                                                             |      |               |       |                                                                                                                                                                                                                                               |       |              |              |       |
| Male                                        | 118                                                                                                                                                                                                                         | 4.9  | 17.452 (2)    | <.001 | 2095                                                                                                                                                                                                                                          | ref   |              |              | .006  |
| Female                                      | 135                                                                                                                                                                                                                         | 5.3  |               |       | 2781                                                                                                                                                                                                                                          | 1.19  | 0.86         | 1.66         | .294  |
| Other                                       | 3                                                                                                                                                                                                                           | 37.5 |               |       | 9                                                                                                                                                                                                                                             | 14.06 | 2.67         | 73.92        | .002  |
| <b>Age</b>                                  |                                                                                                                                                                                                                             |      |               |       |                                                                                                                                                                                                                                               |       |              |              |       |
| 18-29                                       | 47                                                                                                                                                                                                                          | 5.7  | 20.879 (6)    | .002  | 459                                                                                                                                                                                                                                           | ref   |              |              | .041  |
| 30-39 v 18-29                               | 46                                                                                                                                                                                                                          | 5.4  |               |       | 758                                                                                                                                                                                                                                           | 0.95  | 0.47         | 1.93         | .880  |
| 40-49 v 18-39                               | 31                                                                                                                                                                                                                          | 3.9  |               |       | 834                                                                                                                                                                                                                                           | 1.11  | 0.65         | 1.89         | .710  |
| 50-59 v 18-49                               | 46                                                                                                                                                                                                                          | 5.3  |               |       | 895                                                                                                                                                                                                                                           | 1.70  | 1.09         | 2.65         | .020  |
| 60-69 v 18-59                               | 20                                                                                                                                                                                                                          | 2.8  |               |       | 1003                                                                                                                                                                                                                                          | 0.98  | 0.61         | 1.58         | .933  |
| 70-79 v 18-69                               | 42                                                                                                                                                                                                                          | 6.4  |               |       | 760                                                                                                                                                                                                                                           | 1.62  | 1.03         | 2.55         | .038  |
| 80+ v 18-79                                 | 20                                                                                                                                                                                                                          | 9.2  |               |       | 176                                                                                                                                                                                                                                           | 2.28  | 1.15         | 4.56         | .019  |
| <b>Education/Highest qualification</b>      |                                                                                                                                                                                                                             |      |               |       |                                                                                                                                                                                                                                               |       |              |              |       |
| No qualifications                           | 57                                                                                                                                                                                                                          | 9.3  | 37.137 (4)    | <.001 | 407                                                                                                                                                                                                                                           | ref   |              |              | .011  |
| Degree or equivalent and above              | 76                                                                                                                                                                                                                          | 3.7  |               |       | 2451                                                                                                                                                                                                                                          | 0.42  | 0.25         | 0.71         | <.001 |
| A levels / Vocational level 3 or equivalent | 51                                                                                                                                                                                                                          | 4.5  |               |       | 990                                                                                                                                                                                                                                           | 0.57  | 0.33         | 0.99         | .048  |
| Other qual'ns below A level / Voc level 3   | 58                                                                                                                                                                                                                          | 6.9  |               |       | 782                                                                                                                                                                                                                                           | 0.75  | 0.44         | 1.28         | .290  |
| Other qualification                         | 15                                                                                                                                                                                                                          | 4.9  |               |       | 255                                                                                                                                                                                                                                           | 0.50  | 0.22         | 1.14         | .098  |
| <b>Financial Status</b>                     |                                                                                                                                                                                                                             |      |               |       |                                                                                                                                                                                                                                               |       |              |              |       |
| Living comfortably                          | 59                                                                                                                                                                                                                          | 4.6  | 39.487 (4)    | <.001 | 1530                                                                                                                                                                                                                                          | ref   |              |              | .042  |
| Doing alright                               | 71                                                                                                                                                                                                                          | 3.5  |               |       | 1997                                                                                                                                                                                                                                          | 0.91  | 0.59         | 1.39         | .663  |
| Just about getting by                       | 84                                                                                                                                                                                                                          | 7.5  |               |       | 955                                                                                                                                                                                                                                           | 1.46  | 0.92         | 2.33         | .110  |
| Finding it quite difficult                  | 20                                                                                                                                                                                                                          | 5.9  |               |       | 266                                                                                                                                                                                                                                           | 2.05  | 1.09         | 3.84         | .025  |
| Finding it very difficult                   | 20                                                                                                                                                                                                                          | 11.5 |               |       | 137                                                                                                                                                                                                                                           | 1.44  | 0.60         | 3.44         | .417  |
| <b>Country</b>                              |                                                                                                                                                                                                                             |      |               |       |                                                                                                                                                                                                                                               |       |              |              |       |
| England                                     | 239                                                                                                                                                                                                                         | 5.6  | 12.569 (2)    | .002  | 4294                                                                                                                                                                                                                                          | ref   |              |              | .592  |
| Scotland                                    | 11                                                                                                                                                                                                                          | 2.5  |               |       | 383                                                                                                                                                                                                                                           | 0.69  | 0.33         | 1.43         | .316  |
| Wales                                       | 5                                                                                                                                                                                                                           | 2.1  |               |       | 208                                                                                                                                                                                                                                           | 1.07  | 0.46         | 2.48         | .877  |
| <b>Urban/rural</b>                          |                                                                                                                                                                                                                             |      |               |       |                                                                                                                                                                                                                                               |       |              |              |       |
| Urban                                       | 229                                                                                                                                                                                                                         | 5.7  | 13.640 (1)    | <.001 | 3722                                                                                                                                                                                                                                          |       |              |              |       |
| Rural                                       | 27                                                                                                                                                                                                                          | 2.8  |               |       | 1163                                                                                                                                                                                                                                          | 0.66  | 0.42         | 1.03         | .068  |
| <b>Ethnicity</b>                            |                                                                                                                                                                                                                             |      |               |       |                                                                                                                                                                                                                                               |       |              |              |       |
| White British                               | 163                                                                                                                                                                                                                         | 4.1  | 152.072(5)    | <.001 | 4219                                                                                                                                                                                                                                          | ref   |              |              | <.001 |
| Any other white background                  | 12                                                                                                                                                                                                                          | 3.6  |               |       | 318                                                                                                                                                                                                                                           | 1.22  | 0.60         | 2.46         | .583  |
| Mixed or multiple ethnic groups             | 3                                                                                                                                                                                                                           | 3.1  |               |       | 62                                                                                                                                                                                                                                            | 2.59  | 0.90         | 7.42         | .077  |
| Asian or Asian British                      | 59                                                                                                                                                                                                                          | 19.6 |               |       | 159                                                                                                                                                                                                                                           | 4.82  | 2.76         | 8.42         | <.001 |
| Black or Black British                      | 12                                                                                                                                                                                                                          | 11.9 |               |       | 67                                                                                                                                                                                                                                            | 4.52  | 2.04         | 9.99         | <.001 |
| Other                                       | 2                                                                                                                                                                                                                           | 2.5  |               |       | 60                                                                                                                                                                                                                                            | 1.37  | 0.32         | 5.77         | .669  |
|                                             |                                                                                                                                                                                                                             |      |               |       | Hosmer & Lemeshow $\chi^2= 11.202$ , df=8, p=0.191.<br>Final model $\chi^2=87.282$ , df=24, p<0.001<br>Nagelkerke = .070<br>Cases correctly classified: 96.7%.<br>93 cases excluded due to missing data on one or more independent variables. |       |              |              |       |

\* adjusted for all other variables in the model, AOR, adjusted odds ratio; ref, reference category; 95% CI, 95% confidence interval.
